## **A meiosis-specific factor MRM/C19orf57 modulates localization of RAD51 and DMC1 recombinases to DSBs in mouse meiotic recombination**

Kazumasa Takemoto<sup>1,2</sup>, Naoki Tani<sup>3</sup>, Yuki Takada<sup>1</sup>, Sayoko Fujimura<sup>3</sup>, Nobuhiro Tanno<sup>1</sup>, Mariko Yamane<sup>5</sup>, Kaho Okamura<sup>1</sup>, Michihiko Sugimoto<sup>2</sup>, Kimi Araki<sup>2,4</sup> and Kei-ichiro Ishiguro<sup>1,6\*</sup>

1 Department of Chromosome Biology, Institute of Molecular Embryology and Genetics (IMEG), Kumamoto University, Kumamoto, 860-0811 Japan

2 Institute of Resource Development and Analysis, Kumamoto University

3 Liaison Laboratory Research Promotion Center, IMEG, Kumamoto University

4 Center for Metabolic Regulation of Healthy Aging, Kumamoto University, Kumamoto, 860-0811 Japan

5 RIKEN, Center for Biosystems Dynamics Research

6 Lead contact

\* correspondence : [ishiguro@kumamoto-u.ac.jp](mailto:ishiguro@kumamoto-u.ac.jp)

### **Summary**

**Meiotic recombination is critical for genetic exchange and generation of chiasmata that ensures faithful chromosome segregation during meiosis I. Meiotic recombination is initiated by DNA double-strand break (DSB) followed by multiple processes of DNA repair. The exact mechanisms how recombinases localize to DSB remained elusive. Here we show that MRM/C19orf57 is a new player for meiotic recombination in mice. MRM/C19orf57 associates with ssDNA binding proteins, BRCA2 and MEILB2/HSF2BP, critical recruiters of recombinases onto DSB sites. Disruption of MRM/C19orf57 shows severe impact on DSB repair and male fertility. Remarkably, removal of single stranded DNA (ssDNA) binding proteins from DSB sites is delayed, and reciprocally the loading of RAD51 and DMC1 onto resected ssDNA is impaired in *Mrm* KO spermatocytes. We propose that MRM/C19orf57 modulates localization of recombinases to meiotic DSB sites through the interaction with the BRCA2-MEILB2/HSF2BP complex during meiotic recombination.**

## Introduction

Meiosis consists of a single DNA replication followed by two rounds of chromosome segregation (meiosis I and meiosis II), which halves the chromosome number to ultimately produce haploid gametes. During meiotic prophase I, sister chromatids are organized into proteinaceous structures, termed axial element (AE) or chromosome axis (Zickler and Kleckner, 2015). Homologous chromosomes (homologs) then undergo synapsis, which is promoted by assembly of the synaptonemal complex (SC) (Cahoon and Hawley, 2016; Gerton and Hawley, 2005; Page and Hawley, 2004), and meiotic recombination yielding crossovers, a process that produces physical linkages between homologs called chiasmata.

Meiotic recombination is initiated by the introduction of DSB (Lam and Keeney, 2015) (Baudat et al., 2013) by SPO11 (Baudat et al., 2000; Romanienko and Camerini-Otero, 2000) and TOPO6BL (Robert et al., 2016; Vrielynck et al., 2016), and is completed by subsequent homologous recombination (HR)-mediated repair using homologs instead of sister chromatids as a template (Baudat and de Massy, 2007; Handel and Schimenti, 2010; Neale and Keeney, 2006). DNA-ends at DSBs are resected to form 3'-extended single stranded DNA (ssDNA) for invasion into a homologous template. ssDNA is coated by multiple ssDNA binding proteins, replication protein A (RPA) complexes (RPA1, RPA2, RPA3) (Wold et al., 1998) (Ribeiro et al., 2016), MEIOB (Luo et al., 2013) (Souquet et al., 2013), and SPATA22 (Ishishita et al., 2014; La Salle et al., 2012; Xu et al., 2017), to prevent degradation and secondary structure formation.

Subsequently, RAD51 and DMC1 promote preceding removal of ssDNA binding proteins from ssDNA and facilitate invasion of 3'-extended strand into the duplex of the homolog (Cloud et al., 2012) (Kurzbaue et al., 2012) (Shinohara and Shinohara, 2004). In plants and mammals, BRCA2 directly interacts with RAD51 and DMC1, and plays an essential role in loading them onto ssDNA-ends (Jensen et al., 2010) (Sharan et al., 2004) (Siaud et al., 2004). Furthermore, recruitment of RAD51 and DMC1 on ssDNA is mediated by MEILB2/HSF2BP through the interaction with BRCA2 (Brandsma et al., 2019; Zhang et al., 2019). Although it has been proposed that MEILB2/HSF2BP-BRCA2 interaction plays a crucial role in the recruitment of RAD51 and DMC1 onto ssDNA, the exact mechanisms how the MEILB2/HSF2BP-BRCA2 complex acts for ssDNA processing remains elusive (Zhang et al., 2019).

Previously, we identified MEIOSIN that plays an essential role in meiotic initiation both in male and female (Ishiguro et al., 2020). MEIOSIN together with STRA8 acts as a crucial transcription factor to drive meiotic gene activation. *4930432K21Rik* gene was identified as one of the MEIOSIN/STRA8-regulated genes, whose expression was significantly downregulated in RNA-seq analysis of *Meiosin* KO (Ishiguro et al., 2020). And now, here we show that *4930432K21Rik*, which we named Meiotic Recombination Modulator (MRM), is a novel meiotic recombination factor that modulates the single strand invasion step mediated by DMC1 and RAD51. We demonstrate that MRM interacts with MEILB2/HSF2BP, BRCA2 and ssDNA binding proteins. Disruption of *Mrm* leads to defects in DSB repair and homolog synapsis, with severe impact on male fertility. In the absence of MRM, removal of ssDNA binding proteins at the resected DNA-ends was delayed, and reciprocal recruitment of DMC1 and RAD51 was impaired during meiotic recombination. Present study demonstrates that MRM facilitates the recruitment of DMC1 and RAD51 to meiotic DSB sites through the interaction with the BRCA2-MEILB2/HSF2BP complex during meiotic recombination.

## Results

### MRM localizes along chromosome axis during meiotic prophase

A previously uncharacterized *4930432K21Rik* gene was identified as one of the MEIOSIN/STRA8-bound genes during preleptotene (FigS1A), whose expression was significantly downregulated in RNA-seq analysis of *Meiosin* KO (Ishiguro et al., 2020). Indeed, RT-PCR analysis demonstrated that *4930432K21Rik* expression level was down-regulated in *Meiosin* KO testis compared to postnatal day 10 (P10) wild type testes, where a cohort of spermatocytes undergo the first wave of meiotic entry (Fig. S1B).

We further examined the expression pattern of the *4930432K21Rik* in different mouse tissues using RT-PCR analysis. The *4930432K21Rik* gene showed a specific expression in adult testis and embryonic ovary but not in other adult organs that we examined (Fig. 1A, B), suggesting that *4930432K21Rik* is a germ-cell-specific factor. Public RNA-seq data of human cancer cells (Tang et al., 2017) indicated that human *4930432K21Rik* homolog was expressed not only in testis, but also in human tumors such as brain lower grade glioma, ovarian serous cystadenocarcinoma, and thymoma (Fig. S1C, see also

Discussion). Mouse *4930432K21Rik* gene encodes a hypothetical protein C19orf57 homolog which possesses a conserved domain of unknown function (DUF4671). BLAST search analysis revealed that MRM/C19orf57 is conserved in vertebrates (Fig. S2). After its biological function described below, we named the protein product C19orf57 encoded by *4930432K21Rik* gene the ‘Meiotic Recombination Modulator (MRM)’. To examine the subcellular localization patterns of this hypothetical protein, spread chromosomes of spermatocytes were immuno-stained with specific antibodies against MRM along with SYCP3 (a component of meiotic axial element: AE), and SYCP1 (a marker of homolog synapsis). The results showed that MRM protein appeared as foci along the chromosomes (Fig.1C). MRM foci faintly appeared on the nuclei at leptotene stage. Subsequently, the number of those foci culminated with more intense signals at zygotene, and declined from pachytene stage onward with residual foci persisting at diplotene. MRM foci were absent in *Spo11* KO spermatocytes (Fig.1D), whose DSB formation is defective (Lam and Keeney, 2015) (Baudat et al., 2013), indicating nuclear localization of MRM depends on DSBs. Notably, MRM foci were observed along unsynapsed axes, further implying its role at recombination nodules (Fig.1C). Similarly, MRM protein appeared as foci in embryonic oocytes in a similar manner as spermatocytes (Fig.S3A). The observed spatiotemporal localization pattern of MRM protein resembled those of the factors involved in meiotic recombination, implying that MRM plays a role in the process of DSB repair during meiotic recombination.

### **Disruption of *Mrm* led to severe defect in spermatogenesis**

In order to address the role of *Mrm/4930432K21Rik* in meiosis, we deleted Exon3-Exon9 of *Mrm/4930432K21Rik* loci in C57BL/6 fertilized eggs through the CRISPR/Cas9 system (Fig. 2A). Western blotting of the extract from *Mrm* KO testis showed that MRM protein was absent (Fig. 2B), and immunolocalization of MRM along the chromosomes was diminished in *Mrm* KO (Fig. 2C), indicating that the targeted *Mrm/4930432K21Rik* allele was null. Although *Mrm* KO male mice did not show overt phenotype in somatic tissues, defects in male reproductive organs were evident with smaller-than-normal testes (Fig. 2D). Histological analysis revealed that the diameters of seminiferous tubules were reduced compared to those of WT or

heterozygous mice, with lack of post-meiotic spermatids or sperms in a subpopulation of the tubules (47.6 % of total tubules) in eight-week-old *Mrm* KO testes (Fig. S3A). Close inspection of seminiferous tubules indicated that some, if any, seminiferous tubules of *Mrm* KO testis contained only a limited number of post-meiotic spermatids and sperms (Fig. S3A). Flow cytometry analysis of propidium-iodide (PI)-stained testicular cells isolated from 8-week old WT, *Mrm* +/- and *Mrm* KO mice showed that less population of 1N haploid cells were produced in *Mrm* KO mice compared to the control littermate (37.6% of 1N haploid cells in WT, 42.2% in *Mrm* +/- and 15.1 % in *Mrm* KO testicular cells) (Fig. S3B). Accordingly, the sperm density was largely reduced in *Mrm* KO caudal epididymis compared to those of the WT and *Mrm* +/- littermates (Fig. S3C). Mice heterozygous for the *Mrm* allele showed no obvious difference from WT (*Mrm*+/+) in fertility and histology in testes. To examine whether *Mrm* KO affected male fertility, mature *Mrm* KO males and their control littermates were mated with WT females over a period of 5-6 months. While the control males produced normal size of litters over this period, the *Mrm* KO males showed significantly reduced fertility (Fig. S3D). In contrast to male, *Mrm* KO females exhibited seemingly normal fertility with no apparent defect in adult ovaries (FigS4B). We further investigated the fate of *Mrm* KO spermatocytes. Testis-specific histone H1t is a marker of spermatocytes later than mid pachytene. Immunostaining of seminiferous tubules by testis-specific histone H1t indicated that *Mrm* KO spermatocytes reached at least mid to late pachytene stage at P18, while the first wave of spermatogenesis had reached late pachytene stage in wild type (Fig. 2E). However, we noticed that the H1t positive population was markedly reduced in *Mrm* KO testes compared to WT and heterozygous controls at P18 (Fig. 2E), suggesting that progression of meiotic prophase was delayed or blocked in *Mrm* KO spermatocytes. Therefore, although *Mrm* was not necessarily required for fertility in female, its absence had severe impact on male fertility.

### ***Mrm* KO spermatocytes shows defects in DSB repair**

DSB formation and repair are essential steps in meiotic recombination during meiotic prophase. Aforementioned results suggested that MRM protein acts for meiotic recombination (Fig. 1C). To determine the primary defect leading to subfertility in *Mrm* KO males, we analyzed the progression of meiotic prophase in *Mrm* KO testes. We

examined DSB formation and repair events using immunostaining of  $\gamma$ H2AX. A first wave of  $\gamma$ H2A is mediated by ATM after DSB formation at leptotene (Mahadevaiah et al., 2001), and disappears during DSB repair. The second wave of  $\gamma$ H2A at zygotene is mediated by ATR that targets unsynapsed chromosomes (Royo et al., 2013). At leptotene and zygotene,  $\gamma$ H2AX signal appeared in *Mrm* KO spermatocytes in the same manner as WT (Fig. 2F), indicating that DSB formation normally occurred in *Mrm* KO spermatocytes. However, we noticed that  $\gamma$ H2AX signals largely persisted throughout the nuclei until pachytene-like stage in *Mrm* KO spermatocytes, while they overall disappeared in WT pachytene spermatocytes except retaining on the XY body (Fig. 2F). This observation suggested that DSB repair was delayed or blocked in *Mrm* KO spermatocytes. Furthermore, BRCA1, a marker of asynapsis (Scully et al., 1997) (Broering et al., 2014), persisted along unsynapsed autosomal axes in zygotene-like *Mrm* KO spermatocytes (Fig. 2G), suggesting that meiotic silencing of unsynapsed chromatin (MUSC) was activated as a result of delayed homolog synapsis in *Mrm* KO spermatocytes. A subpopulation of *Mrm* KO spermatocytes indeed showed a pachytene morphology, whose 19 pairs of autosomal axes were apparently fully synapsed. However, the number of MLH1 foci, a marker of crossover (CO), was significantly reduced in *Mrm* KO pachytene-like spermatocytes compared to WT pachytene spermatocytes (Fig. 2H). This implies that crossover recombination was incomplete in the absence of MRM, despite the fact that a subpopulation of *Mrm* KO spermatocytes reached mid to late pachytene stage (Fig. 2E). Consequently, TUNEL positive cells were robustly observed in the *Mrm* KO tubules (average 44.3 % of TUNEL positive spermatocytes in a given tubule) at P18, when the first wave of meiotic prophase reached late pachytene (Fig. 2I). This observation suggested that a certain population of *Mrm* KO spermatocytes were consequently eliminated by apoptosis, probably at mid to late pachytene stage. The same phenotype persisted through adulthood in *Mrm* KO testes, because higher number of the TUNEL positive seminiferous tubules (~31.9%) were observed in *Mrm* KO testis (Fig. 2J). As a result, *Mrm* KO testes showed seminiferous tubules lacking post-meiotic spermatids or sperms at eight-week-old (Fig. S3A). Therefore, we reasoned that the primary defect in *Mrm* KO testes derived from failure of DSB repair during meiotic prophase.

### **MRM facilitates recruitment of RAD51 and DMC1 recombinases to DSB sites**

Given that MRM is required for DSB repair, we sought how MRM was involved in DSB repair processes by screening its interacting factors. Mass spectrometry (MS) analysis of immunoprecipitates of MRM from testes extracts identified MEILB2/HSF2BP (Brandsma et al., 2019; Yoshima et al., 1998; Zhang et al., 2019), BRCA2 (Sharan et al., 2004), RPA1 (Wold et al., 1998) and MEIOB (Luo et al., 2013; Souquet et al., 2013), which are known to play a role in meiotic recombination (Fig. 3A, B). This suggests that MRM mediates the process of meiotic recombination through the interaction with these factors. Notably, it was shown that MEILB2/HSF2BP directly interacts with BRCA2 and plays a role in recruiting recombinase RAD51 to DSBs through the interaction between BRCA2 and RAD51 (Zhang et al., 2019). Indeed, MRM overall colocalizes with MEILB2/HSF2BP and MEIOB on the chromatin at zygotene (Fig. 3C, D), while it rarely did with RAD51 and DMC1 (Fig. 3E, F).

We further monitored the dynamics of those factors involved in meiotic recombination in *Mrm* KO. Following DSB introduction, single strand DNA (ssDNA) binding proteins, RPA1, RPA2, RPA3 (Ribeiro et al., 2016), SPATA22 (Ishishita et al., 2014; La Salle et al., 2012; Xu et al., 2017) and MEIOB (Luo et al., 2013; Souquet et al., 2013), localize to the resected single stranded DNA-ends. Subsequently, DMC1 and RAD51 are recruited to the DNA-ends to promote strand invasion for homologous recombination (Pittman et al., 1998; Yoshida et al., 1998) (Cloud et al., 2012). In WT spermatocytes, ssDNA binding proteins, RPA2, MEIOB, and SPATA22 appeared at leptotene, culminated at zygotene, and declined toward pachytene as the resected ssDNA were repaired (Fig. 4A-C). In contrast, elevated number of RPA2 and SPATA22 foci were accumulated in *Mrm* KO spermatocytes compared to the controls (Fig. 4B-C), suggesting that the removal of RPA2 and SPATA22 was delayed or impaired in the absence of MRM. We noticed that comparable number of MEIOB foci were observed at zygotene through pachytene in the control and *Mrm* KO spermatocytes (Fig. 4A). Since MEIOB rather persisted along the axes at pachytene irrespective of the presence or absence of MRM (Fig. 4A), MEIOB may have another role in the processing of joint molecules at later stage of recombination as proposed in the previous study (Luo et al., 2013).

Crucially, localization of MEILB2/HSF2BP was partly impaired in *Mrm* KO spermatocytes (Fig. 4D), suggesting that MRM facilitates localization of MEILB2/HSF2BP onto DSB sites. Accordingly, the number of RAD51 and DMC1 foci was significantly reduced in *Mrm* KO spermatocytes (Fig. 4E, F), suggesting that localization of RAD51 and DMC1 was partly destabilized or delayed in the absence of MRM. However, *Mrm* KO showed less impact on localization of RAD51 and DMC1 than *Meilb2* KO, where RAD51 and DMC1 were completely abolished (Zhang et al., 2019). These results suggest that MRM at least in part facilitates recruitment of RAD51 and DMC1 recombinases to DSB sites through the interaction with MEILB2/HSF2BP and removes ssDNA binding proteins during meiotic recombination (Fig. 4G).

## Discussion

Present study revealed that MRM/C19ORF57 plays a role in meiotic recombination. A key finding is that MRM interacts with MEILB2/HSF2BP. It has been shown that MEILB2/HSF2BP directly interacts with BRCA2 to promote loading of RAD51 and DMC1 recombinases onto DSB sites (Zhang et al., 2019). This process is mediated by two interactions: between BRCA2 and MEILB2/HSF2BP and between BRCA2 and RAD51/DMC1. However, how MEILB2/HSF2BP localizes to the DSB sites has been unclear. Present study demonstrates that MRM interacts with MEILB2/HSF2BP, BRCA2 and ssDNA binding proteins (Fig3A, B). Since armadillo repeats of MEILB2/HSF2BP directly interacts with BRCA2 (Brandsma et al., 2019; Zhang et al., 2019), BRCA2 was co-precipitated probably via MEILB2/HSF2BP in our MRM immunoprecipitates. MRM well colocalizes with MEILB2/HSF2BP and ssDNA binding proteins on the chromatin, while it rarely does with RAD51 and DMC1 (Fig3C-F). Furthermore, localizations of ssDNA binding proteins RPA and SPATA22 was elevated in *Mrm* KO spermatocytes, while those of MEILB2/HSF2BP, RAD51 and DMC1 were partly reduced (Fig. 4). These results suggest that MRM may initially bind to ssDNA-binding proteins and MEILB2/HSF2BP, then facilitate recruitment of the BRCA2-RAD51 and BRCA2-DMC1 complexes onto MEILB2/HSF2BP-bound DSB sites. It is assumed that ssDNA binding proteins are replaced with RAD51 and DMC1 recombinases at DSBs (Fig. 4G). Thus, we speculate that MRM facilitates the loading



of RAD51 and DMC1 recombinases onto DSBs through the interaction with MEILB2/HSF2BP and ssDNA binding proteins.

We noticed that MRM persisted in late meiotic prophase (Fig 1C). Further, it was previously shown that MEILB2/HSF2BP persisted in pachytene (Zhang et al., 2019). It was demonstrated that early meiotic repair pathway that acts by default at the beginning of meiotic prophase is replaced sequentially by non-homologous end joining (NHEJ) and somatic-like homologous recombination (HR) pathway involving RAD51 (Enguita-Marruedo et al., 2019). Although we do not yet know the biological relevance of the detectable MRM foci in late meiotic prophase, MRM may be involved in “somatic-like HR repair pathway” in that stage.

In mouse, meiosis-specific ssDNA binding proteins MEIOB (Luo et al., 2013) (Souquet et al., 2013), and SPATA22 (Ishishita et al., 2014; La Salle et al., 2012; Xu et al., 2017) exist along with canonical ssDNA binding proteins RPA1-3. Thus, meiosis-specific ssDNA binding proteins have unique roles in processing homology-directed DNA repair during meiotic recombination. It has been shown that MEIOB interacts with SPATA22, and that their chromatin loading is interdependent (Luo et al., 2013). In the present study, we have shown that removal of SPATA22 was affected in *Mrm* KO spermatocytes (Fig. 4C), while that of MEIOB apparently was not (Fig. 4A). We do not know exact reason for different dynamics of SPATA22 and MEIOB in *Mrm* KO spermatocytes. However, this may be due to existence of another population of chromatin-bound SPATA22 and MEIOB at different time points, since it was previously proposed that MEIOB might mediate second-end capture after strand invasion (Luo et al., 2013). Thus, MRM may specifically modulate localization of SPATA22 and MEIOB in the strand invasion rather than later steps of recombination.

DSS1 is widely conserved in vertebrates, nematode, plant and fungi (Kojic et al., 2003) (Marston et al., 1999) (Pispa et al., 2008) (Dray et al., 2006). In somatic cells, DSS1 interacts with BRCA2, and facilitates RPA-RAD51 exchange on ssDNA during homologous recombination (Zhao et al., 2015). Given that DSS1-BRCA2 interaction plays a role in replacing ssDNA binding protein with recombinases at DSBs, a similar mechanism may apply to MRM-MEILB2/HSF2BP-BRCA2 interactions. As in the case of the previous study on MEILB2/HSF2BP (Zhang et al., 2019), requirement of MRM

was also sexually dimorphic (Fig.S4). Although it is yet to be examined whether DSS1 or other factors compensates MRM in meiotic recombination, such redundant mechanisms may account for why residual sperm can be produced in *Mrm* KO males (Fig.S3), and MRM was not necessarily essential for female fertility (Fig. S4).

Lastly, it should be mentioned that expression levels of human *HSF2BP* is elevated in some tumors (Zhang et al., 2019) (Brandsma et al., 2019). Notably, expression levels of *MRM/C19ORF57* was also elevated in the similar set of tumors (Fig. S1C) (Tang et al., 2017). Therefore, it is possible that both *MRM/C19ORF57* and *MEILB2/HSF2BP* are co-expressed in a particular type of human tumors. This evidence supports the previously proposed hypothesis that ectopic expression of MEILB2 may perturb the intrinsic BRCA2 function through direct interaction in cancer cells (Zhang et al., 2019). Thus, misexpression of *MRM/C19ORF57* together with MEILB2 may compromise the function of the BRCA2-RAD51 complex during DNA repair in human cancers. Altogether, our study will shed light on multiple layers of mechanisms how recombinases are loaded onto DSB sites in vertebrate meiotic recombination.

#### **Acknowledgments:**

The authors thank Kumi Matsuura for technical support of ChIP-seq data reanalysis, Drs Satoshi Namekawa and Marry Ann Handel for provision of antibodies. This work was supported in part by KAKENHI (#17H03634, #18K19304, #19H05245, #19H05743, #JP 16H06276) from MEXT, Japan; NIG-JOINT (40A2018, 32A2019); the program of the Joint Usage/ IMEG Research Center for Developmental Medicine; Takeda Science Foundation; Yamada Science Foundation; Ichiro Kanehara Foundation for Medical Science and Medical Care (to K.I.).

**Author contributions:** K.T. performed the most of experiments. N.Tani performed MS analysis. Y.T. performed the RT-PCR and embryonic gonadal experiments. K.A. M.S. designed the knockout mice. N.Tanno performed flowcytometry. K.O. supported the antibody production. S.F. performed histological analyses. M.Y. performed bioinformatics analyses. K.I. supervised experiments, conducted the study and wrote the manuscript.

**Declaration of interests:** The authors declare no competing interests.

## Figure legend

### Figure 1. Identification of the novel meiosis-specific factor MRM

(A) The tissue-specific expression pattern of *4930432K21Rik/Mrm* was examined using RT-PCR. Testis RNA was obtained from embryonic day 18 (E18.5) testis and tissues from adult eight-week-old male mice. RT- indicates control PCR without reverse transcription. (B) The expression pattern of *4930432K21Rik/Mrm* in the embryonic ovary was examined using RT-PCR. Ovary RNA was obtained from E12.5- E15.5 female mice. (C) Chromosome spreads of WT spermatocytes were stained for MRM, SYCP3, SYCP1. Scale bar: 5  $\mu$ m. Enlarged images are shown to highlight axes that are going to be synapsed (middle). Numbers of MRM foci on SYCP3 axes are shown in the scatter plot with median (right). n indicates the number of cells examined. For immunostaining background, MRM-immunostained signals were counted in *Mrm* KO. Note that numbers of MRM foci were significantly high in WT compared to those in *Mrm* KO. (see Fig. 2C) (D) Chromosome spreads of *Spo11* KO spermatocytes were stained for MRM and SYCP3. Scale bar: 5  $\mu$ m.

### Figure 2. *Mrm* KO spermatocytes show defects in DSB repair and homolog synapsis

(A) The targeted Exon3-9 deletion allele of *Mrm* were generated by the introduction of CAS9, the synthetic gRNAs designed to target intron2 and the downstream of Exon9 (arrowheads), and ssODN into C57BL/6 fertilized eggs. Three lines of KO mice were established. Line #11 of *Mrm* KO mice was used in most of the experiments, unless otherwise stated. (B) Immunoblot analysis of testis extracts prepared from WT and *Mrm* KO (compound KO alleles of #9 and #11) mice with indicated genotypes (P18). Note that MRM protein migrated slower than the expected size calculated from the molecular weight. (C) Chromosome spreads of WT and *Mrm* KO spermatocytes were stained for MRM, SYCP3, and DAPI. Numbers of background MRM-immunostained signals in *Mrm* KO axes are shown in the scatter plot with median (right). n indicates the number of cells examined. Note that the MRM-immunostained signals in *Mrm* KO were considered to be background and their numbers were negligibly small compared to those in WT as shown in Fig. 1C, confirming the specificity of the anti-MRM antibody.

Scale bar: 5  $\mu$ m. **(D)** Testes from WT, and *Mrm* KO mice (eight-week-old). Scale bar: 2 mm. **(E)** Seminiferous tubule sections from WT and *Mrm* KO mice (P18, 8w) were stained for SYCP3, H1t and DAPI. Pa: Pachytene spermatocyte, rS: round spermatid, eS: elongated spermatid. Shown below is the quantification of the seminiferous tubules that have H1t +/SYCP3+ cells per the seminiferous tubules that have SYCP3+ spermatocyte cells in WT (p18: n= 4, 8w: n=3), heterozygous (p18: n= 3, 8w: n=4) and *Mrm* KO (p18: n= 3, 8w: n=5) testes (bar graph with SD). n: the number of animals examined for each genotype. Scale bar: 25  $\mu$ m. **(F)** Chromosome spreads of WT and *Mrm* KO spermatocytes were stained for  $\gamma$ H2AX, SYCP3, and SYCP1. **(G)** Chromosome spreads of WT and *Mrm* KO spermatocytes were stained for BRCA1, SYCP3, and SYCP1. Zyg.-like: Zygotene-like, Pachy.-like: Pachytene-like. **(H)** Chromosome spreads of WT and *Mrm* KO spermatocytes were stained for MLH1, SYCP3 and DAPI. *p*-value (Mann-Whitney U-test) is shown by statistical significance. \*\*\*:  $p < 0.0001$ . Scale bars: 5  $\mu$ m. **(I)** Seminiferous tubule sections from WT, *Mrm* +/- and *Mrm* KO mice (P18) were stained for SYCP3, TUNEL, SYCP1, and DAPI. Shown on the right is the quantification of the TUNEL+ cells per total SYCP3 + spermatocytes. Percentages of TUNEL+ cells were calculated in 16 seminiferous tubules, that have at least one TUNEL+ cell. Averaged percentage from 3 animals (total 48 tubules) for each genotype is shown with SD. Scale bar: 25  $\mu$ m. **(J)** Seminiferous tubule sections from 8w mice were immunostained as in I. Shown on the right is the quantification of the seminiferous tubules that have TUNEL+ cells per total tubules in WT (8w: n= 3), *Mrm* +/- (8w: n=4) and *Mrm* KO (8w: n=5) testes (bar graph with SD). Scale bar: 25  $\mu$ m.

### **Figure 3. MRM interacts with BRCA2, MEILB2 and ssDNA binding proteins**

**(A)** The immunoprecipitates of MRM from the chromatin-unbound fraction of the testis were subjected to liquid chromatography tandem-mass spectrometry (LC-MS/MS) analyses. The meiotic recombination proteins identified in the LC-MS/MS analyses of the samples are listed with the number of peptide hits and Mascot scores in the table. **(B)** Immunoprecipitates of MRM from chromatin-unbound extracts of WT testes were immunoblotted as indicated. **(C)** Chromosome spreads of WT zygotene spermatocytes were stained for SYCP3, MRM and MEILB2. Quantification of overlapped MRM and MEILB2 foci per total MRM or per total MEILB2 is shown (n= 14). **(D)** Chromosome

spreads of WT zygotene spermatocytes were stained for SYCP3, MRM and MEIOB. Quantification of overlapped MRM and MEIOB foci per total MRM or per total MEIOB is shown (n=11). **(E)** Chromosome spreads of WT zygotene spermatocytes were stained for SYCP3, MRM and RAD51. Quantification of overlapped MRM and RAD51 foci per total MRM or per total RAD51 is shown (n=15). **(F)** Chromosome spreads of WT zygotene spermatocytes were stained for SYCP3, MRM and DMC1. Quantification of overlapped MRM and DMC1 foci per total MRM or per total DMC1 is shown (n= 11).

**Figure 4. MRM plays a role in recruiting recombinases onto DSB sites**

**(A)** Chromosome spreads of *Mrm* +/- and *Mrm* KO spermatocytes were stained for MEIOB, SYCP3, and SYCP1. Immunostained chromosome spread of zygotene spermatocytes are shown. The number of MEIOB foci is shown in the scatter plot with median (right). *p*-value (Mann-Whitney U-test) is shown by statistical significance. \*\*\*:  $p < 0.0001$ . \*\*:  $p < 0.001$ . Lep: leptotene, Zyg.: Zygotene, Pac.: Pachytene, Z-like: Zygotene-like, P-like: Pachytene-like.

**(B)** Chromosome spreads of *Mrm* +/- and *Mrm* KO spermatocytes were stained for RPA2, SYCP3, and SYCP1. The number of RPA2 foci is shown as in (A).

**(C)** Chromosome spreads of *Mrm* +/- and *Mrm* KO spermatocytes were stained for SPATA22, SYCP3, and SYCP1. The number of SPATA22 foci is shown as in (A).

**(D)** Chromosome spreads of *Mrm* +/- and *Mrm* KO spermatocytes were stained for MEILB2, SYCP3, and SYCP1. The number of MEILB2 foci is shown as in (A).

**(E)** Chromosome spreads of *Mrm* +/- and *Mrm* KO spermatocytes were stained for DMC1, SYCP3, and SYCP1. The number of DMC1 foci is shown as in (A).

**(F)** Chromosome spreads of *Mrm* +/- and *Mrm* KO spermatocytes were stained for RAD51, SYCP3, and SYCP1. The number of RAD51 foci is shown as in (A).

**(G)** Schematic model how MRM plays a role in meiotic recombination. Black and grey lines indicate dsDNAs from homologous chromosomes.

Magenta circle: MRM, Green circle: ssDNA binding proteins, Orange oval: MEILB2, Blue oval: the RAD51-BRCA2 and the DMC1-BRCA2 complexes.

Scale bars: 5  $\mu$ m.

**Supplementary Figure 1. Identification of the novel meiosis-specific factor MRM**

**(related to Figure 1)**

(A) Genomic view of MEIOSIN and STRA8 binding peaks over *4930432K21Rik/Mrm* loci. To specify testis specific TSS, RNA-seq of the 5' capped end of the mRNA (CAGE) in P10.5 testis is shown (Li et al., 2013). Genomic coordinates were obtained from Ensembl.

(B) The expression of *4930432K21Rik/Mrm* in WT, *Meiosin* KO and *Stra8* KO was examined using RT-PCR. Testis RNA was obtained from WT (P8 and P10), *Meiosin* KO and *Stra8* KO.

(C) Expression of *MRM/C19orf57* in human tumors and normal tissues of different origin. The plot was generated from public RNA-seq data using GEPIA server (Tang et al., 2017). Red box indicates tumor. Grey box indicates normal tissue. The numbers of normal (num(N)) and tumor (num(T)) samples are indicated; Tpm: transcripts per kilobase million. Statistical significance was determined by one-way ANOVA.

**Supplementary Figure 2. Sequence alignment of MRM/C19orf57 homologs in vertebrates (related to Figure 1)**

MRM/C19orf57 protein is conserved among vertebrates. The amino acid sequence of *M. musculus* MRM (mouse, LC507101) derived from this study. C19orf57 homologs of *R. norvegicus* (rat, XP\_008770650.1), *H. sapiens* (human, NP\_001332772.1), *Macaca mulatta* (monkey, XP\_001111192.4), *Pogona vitticeps* (reptile, XP\_020654389.1) and *Gallus gallus* (chick, XP\_025001559.1) were obtained from the National Center for Biotechnology Information-National Institutes of Health (NCBI-NIH) protein database.

**Supplementary Figure 3. Spermatogenesis was impaired in *Mrm* KO testis (related to Figure 2)**

(A) Hematoxylin and eosin staining of the sections from WT, *Mrm* +/- and *Mrm* KO testes (eight-week-old). Arrow indicates a vacuole. Scale bar: 50  $\mu$ m. Quantification of the seminiferous tubules containing post-meiotic cells per total number of the seminiferous tubules is shown on the right (bar graph with SD). n: the number of animals examined for each genotype. (B) Flow cytometry histogram of propidium-iodide (PI)-stained testicular cells isolated from 8-week old *Mrm* +/+ (WT), *Mrm* +/-

and *Mrm* KO mice. N indicates DNA content in the cell population. Quantification of 1N post-meiotic cells is shown (bar graph with SD). n: the number of animals examined for each genotype. **(C)** Hematoxylin and eosin staining of the sections from *Mrm* +/+ (WT), *Mrm* +/- and *Mrm* KO epididymis (eight-week-old). Scale bar: 50  $\mu$ m. **(D)** Fertility of *Mrm* KO males (Line #6, Line #11) was examined by mating with *Mrm* +/- females for the indicated period.

Note that apparent differences were not observed between *Mrm* +/+ (WT) and *Mrm* +/- testes. Thus, they were used as controls in the present study.

#### **Supplementary Figure 4. Phenotypic analyses of *Mrm* KO ovaries (related to Figure 2)**

**(A)** Chromosome spreads of oocytes in WT and *Mrm* KO (KO allele #6) were stained for MRM, SYCP3, and SYCP1. Scale bar: 5  $\mu$ m. **(B)** Hematoxylin and eosin staining of the sections from *Mrm* +/- and *Mrm* KO (KO allele #6) ovaries (eight-week-old). Scale bar: 500  $\mu$ m.

#### **Table S1 (Excel file)**

Primers and oligos used in this study, related to STAR Methods and the Key Resources Table

#### **STAR Methods**

#### **Lead Contact and Materials Availability**

Further information and requests for resources and reagents should be directed to and will be fulfilled by the Lead Contact, Kei-ichiro Ishiguro ([ishiguro@kumamoto-u.ac.jp](mailto:ishiguro@kumamoto-u.ac.jp)). Mouse lines generated in this study have been deposited to Center for Animal Resources and Development (CARD). The antibodies are available upon request. There are restrictions to the availability of antibodies due to the lack of an external centralized repository for its distribution and our need to maintain the stock. We are glad to share antibodies with reasonable compensation by requestor for its processing and shipping.

All unique/stable reagents generated in this study are available from the Lead Contact with a completed Materials Transfer Agreement.

## Experimental Model and Subject Details

### Animals

*4930432K21Rik/Mrm* knockout mice were C57BL/6 background. *Spo11* KO knockout mouse was reported earlier (Baudat et al., 2000). Male mice were used for immunoprecipitation of testis extracts, histological analysis of testes, immunostaining of testes, RT-PCR experiments. Female mice were used for histological analysis of the ovaries, immunostaining experiments. Whenever possible, each knockout animal was compared to littermates or age-matched non-littermates from the same colony, unless otherwise described. Animal experiments were approved by the Institutional Animal Care and Use Committee (approval F28-078, A30-001, A28-026).

### Method Details

#### Generation of *4930432K21Rik/Mrm* knockout mice and genotyping

*4930432K21Rik* knockout mouse was generated by introducing Cas9 protein (317-08441; NIPPON GENE, Toyama, Japan), tracrRNA (GE-002; FASMAC, Kanagawa, Japan), synthetic crRNA (FASMAC), and ssODN into C57BL/6N fertilized eggs using electroporation. For generating *4930432K21Rik/Mrm* Exon3-9 deletion (Ex3-9 $\Delta$ ) allele, the synthetic crRNAs were designed to direct GCAGGAAGTTCATAGCCACA(ggg) of the *4930432K21Rik* intron 2 and TGGGTAACAGATCTACACAC(agg) in the 3'-neighboring region of the Exon9. ssODN : 5'-GGCTACAACACTACAGGGAGGTTTTGTGCTCTCTAACCTGTGaatcGGCTATGAACTCC TGCCGCCATCAGCTTCCAAAATACAG-3' was used as a homologous recombination template.

The electroporation solutions contained [10 $\mu$ M of tracrRNA, 10 $\mu$ M of synthetic crRNA, 0.1  $\mu$ g/ $\mu$ l of Cas9 protein, ssODN (1 $\mu$ g/ $\mu$ l)] for *4930432K21Rik* knockout in Opti-MEM I Reduced Serum Medium (31985062; Thermo Fisher Scientific). Electroporation was carried out using the Super Electroporator NEPA 21 (NEPA GENE, Chiba, Japan) on



Glass Microslides with round wire electrodes, 1.0 mm gap (45-0104; BTX, Holliston, MA). Four steps of square pulses were applied (1, three times of 3 mS poring pulses with 97 mS intervals at 30 V; 2, three times of 3 mS polarity-changed poring pulses with 97 mS intervals at 30 V; 3, five times of 50 mS transfer pulses with 50 mS intervals at 4 V with 40% decay of voltage per each pulse; 4, five times of 50 mS polarity-changed transfer pulses with 50 mS intervals at 4 V with 40% decay of voltage per each pulse).

The targeted *4930432K21Rik* Ex3-9 $\Delta$  allele in F0 mice were identified by PCR using the following primers; 4930432K21Rik-1F : 5'-TGTTACACAAAGTTCTTGAATCAG-3' and 4930432K21Rik-3R : 5'-TCTGTGTGAGAATTGAGGCCTAAGC-3' for the knockout allele (309 bp). 4930432K21Rik-2F: 5'-TAAATGATGCAGTCATGAGCCTCTG-3' and 4930432K21Rik-1R: 5'-GGGGGTGATCAGAGCTCATTCTAG-3' for the Ex9 downstream of wild-type allele (345 bp). 4930432K21Rik-1F and 4930432K21Rik-2R: 5'-GGCTTTGAGGGATGGAGGCCGACCC-3': for the intron 2 of wild-type allele (365 bp). The PCR amplicons were verified by sequencing. Primer sequences are listed in Table S1.

#### **PCR with reverse transcription.**

Total RNA was isolated from tissues and embryonic gonads using TRIzol (Thermo Fisher). cDNA was generated from total RNA using Superscript III (Thermo Fisher) followed by PCR amplification using Ex-Taq polymerase (Takara) and template cDNA.

For RT-qPCR, total RNA was isolated from WT, *Meiosin* KO and *Stra8* KO testes, and cDNA was generated as described previously (Ishiguro et al., 2020). *4930432K21Rik* /*Mrm* cDNA was quantified by  $\Delta$ CT method using TB Green Premix Ex Taq II (Tli RNaseH Plus) and Thermal cycler Dice (Takara), and normalized by *GAPDH* expression level.

Sequences of primers used for RT-PCR (Fig1 A) are as follows:

GAPDH-F: 5'-TTCACCACCATGGAGAAGGC-3'

GAPDH-R: 5'-GGCATGGACTGTGGTCATGA-3'

4930432K21Rik-F1: 5'-GGCGACCTATCCCCATCAG-3'

4930432K21Rik-R1: 5'-GGCCTTGTTTCCTGGGAAGG-3'

Sequences of primers used for RT-PCR (Fig1 B, Fig S1B) are as follows:

MRMqPCR\_F: 5'- AGTCACCAAACCTCAATCCA-3'

MRMqPCR\_R: 5'- AACCCCTTTGTCAGGTAAGG-3'

Gapdh\_F2: 5'-ACCACAGTCCATGCCATCAC-3'

Gapdh\_R2: 5'-TCCACCACCCTGTTGCTGTA-3'

Primer sequences are listed in Table S1.

### **Preparation of testis extracts and immunoprecipitation**

Testis chromatin-bound and -unbound extracts were prepared as described previously (Ishiguro et al., 2014). Briefly, testicular cells were suspended in low salt extraction buffer (20 mM Tris-HCl [pH 7.5], 100 mM KCl, 0.4 mM EDTA, 0.1% TritonX100, 10% glycerol, 1 mM  $\beta$ -mercaptoethanol) supplemented with Complete Protease Inhibitor (Roche). After homogenization, the soluble chromatin-unbound fraction was separated after centrifugation at 100,000g for 10 min at 4°C. The chromatin bound fraction was extracted from the insoluble pellet by high salt extraction buffer (20 mM HEPES-KOH [pH 7.0], 400 mM KCl, 5 mM MgCl<sub>2</sub>, 0.1% Tween20, 10% glycerol, 1 mM  $\beta$ -mercaptoethanol) supplemented with Complete Protease Inhibitor. The solubilized chromatin fraction was collected after centrifugation at 100,000g for 10 min at 4°C.

For immunoprecipitation of endogenous 4930432K21Rik from chromatin unbound fraction, 3.75  $\mu$ g of affinity-purified rat anti-4930432K21Rik and control IgG antibodies were crosslinked to 100  $\mu$ l of protein A-Dynabeads (Thermo-Fisher) by DMP (Sigma). The antibody-crosslinked beads were added to the testis extracts prepared from wild type testes (17 to 21-day-old). The beads were washed with low salt extraction buffer. The bead-bound proteins were eluted with 40  $\mu$ l of elution buffer (100 mM Glycine-HCl [pH 2.5], 150 mM NaCl), and then neutralized with 4  $\mu$ l of 1 M Tris-HCl [pH 8.0]. The immunoprecipitated proteins were separately run on NuPAGE Bis-Tris 4%-12% gel (Thermo-Fisher) in MOPS-SDS buffer (Thermo-Fisher) for detection of MRM, HSF2BP/MEILB, Actin, and on NuPAGE Tris-Acetate 3%-8% gel (Thermo-

Fisher) in Tris-Acetate -SDS buffer (Thermo-Fisher) for detection of BRCA2, MRM, HSF2BP/MEILB, RPA1, RAD51, DMC1, Actin. Immunoblots were detected by VeritBlot for IP detection reagent (HRP) (ab131366, abcam, 1:3000 dilution). Immunoblot image was developed using ECL prime (GE healthcare) and captured by FUSION Solo (VILBER). For the immunoblot of whole testes extracts from WT and *Mrm* KO mice, lysate were prepared in RIPA buffer and run on 8% Laemmli SDS-PAGE in Tris-Glycine-SDS buffer. Note that mobility of MRM protein was slower than expected molecular weight and slightly different depending on the gels and running buffers.

### **Mass spectrometry**

The immunoprecipitated proteins were run on 4-12 % NuPAGE (Thermo Fisher) by 1 cm from the well and stained with SimplyBlue (Thermo Fisher) for the in-gel digestion. The gel containing proteins was excised, cut into approximately 1mm sized pieces. Proteins in the gel pieces were reduced with DTT (Thermo Fisher), alkylated with iodoacetamide (Thermo Fisher), and digested with trypsin and lysyl endopeptidase (Promega) in a buffer containing 40 mM ammonium bicarbonate, pH 8.0, overnight at 37°C. The resultant peptides were analyzed on an Advance UHPLC system (AMR/Michrom Bioscience) coupled to a Q Exactive mass spectrometer (Thermo Fisher) processing the raw mass spectrum using Xcalibur (Thermo Fisher Scientific). The raw LC-MS/MS data was analyzed against the NCBI non-redundant protein/translated nucleotide database restricted to *Mus musculus* using Proteome Discoverer version 1.4 (Thermo Fisher) with the Mascot search engine version 2.5 (Matrix Science). A decoy database comprised of either randomized or reversed sequences in the target database was used for false discovery rate (FDR) estimation, and Percolator algorithm was used to evaluate false positives. Search results were filtered against 1% global FDR for high confidence level.

### **Antibodies**

The following antibodies were used for immunoblot (IB) and immunofluorescence (IF) studies: rabbit anti-Actin (IB, 1:1000, CST #4970), mouse anti-MLH1 (IF, 1:500, BD Biosciences: 551092), rabbit anti-SYCP1 (IF, 1:1000, Abcam ab15090), mouse anti-

$\gamma$ H2AX (IF, 1:1000, Abcam ab26350), rabbit anti-DMC1 (IF, 1:500, Santa Cruz: SC-22768), rabbit anti-RAD51 (IF, 1:500, Santa Cruz: SC-8349), rabbit anti-SPATA22 (IF, 1:100, proteintech 16989-1-AP), rabbit anti-RPA1/RPA70 (IB, 1:1000, Abcam ab87272), rat anti-RPA2 (IF, 1:1000, CST 2208), rabbit anti-MEIOB (IF, 1:100, Millipore # ABE1414), mouse anti-SYCP1 (IF, 1:1000) (Ishiguro et al., 2011), rat anti-SYCP3 (Ishiguro et al., 2020) (IF, 1:1000), guinea pig anti-SYCP3 (Ishiguro et al., 2020) (IF, 1:2000), goat anti-BRCA1 (IF, 1:500, SantaCruz sc-1553), rabbit anti-BRCA2 (IB, 1:1000, Abcam ab27976), guinea pig anti-H1t (IF, 1:2000, kindly provided by Marry Ann Handel).

Polyclonal antibodies against mouse MRM/4930432K21Rik-N and mouse MEILB2/HSF2BP were generated by immunizing rabbits and rats. His-tagged recombinant proteins of MRM/4930432K21Rik-N (aa 1-207) and MEILB2/HSF2BP (Full length) were produced by inserting cDNA fragments in-frame with pET28c (Novagen) in *E. coli* strain BL21-CodonPlus(DE3)-RIPL (Agilent), solubilized in a denaturing buffer (6 M HCl-Guanidine, 20 mM Tris-HCl [pH 7.5]) and purified by Ni-NTA (QIAGEN) under denaturing conditions. The antibodies were affinity-purified from the immunized serum with immobilized antigen peptides on CNBr-activated Sepharose (GE healthcare). Rat MEILB2/HSF2BP antibody was labeled by Alexa555 using Alexa Fluor 555 Antibody labeling kit (Thermo A20187).

### **Histological Analysis**

Testes, caudal epididymis and ovaries were fixed in Bouin's solution, and embedded in paraffin. Sections were prepared on CREST-coated slides (Matsunami) at 6  $\mu$ m thickness. The slides were dehydrated and stained with hematoxylin and eosin.

For Immunofluorescence staining, testes were embedded in Tissue-Tek O.C.T. compound (Sakura Finetek) and frozen. Cryosections were prepared on the CREST-coated slides (Matsunami) at 8  $\mu$ m thickness, and then air-dried. The serial sections of frozen testes were fixed in 4% paraformaldehyde in PBS for 5 min at room temperature and washed briefly in PBS. After washing, the serial sections were permeabilized in 0.1% TritonX100 in PBS for 5 min. The sections were blocked in 3% BSA/PBS, and incubated at room temperature with the primary antibodies in a blocking solution. After

three washes in PBS, the sections were incubated for 1 h at room temperature with Alexa-dye-conjugated secondary antibodies (1:1500; Invitrogen) in a blocking solution. TUNEL assay was performed using MEBSTAIN Apoptosis TUNEL Kit Direct (MBL 8445). DNA was counterstained with Vectashield mounting medium containing DAPI (Vector Laboratory).

### **Immunostaining of spermatocytes**

Surface-spread nuclei from spermatocytes and oocytes were prepared by the dry down method as described (Peters et al., 1997) with a modification. The slides were then air-dried and washed with water containing 0.1 % Tween20 or frozen for longer storage at -30°C. For staining of HSF2BP/MEILB2, the slides were heat-treated briefly by microwave oven in TE (pH8.0) for antigen retrieval. The slides were permeabilized in 0.1% TritonX100 in PBS for 5 min, blocked in 3% BSA/PBS, and incubated at room temperature with the primary antibodies in 3% BSA/PBS. For immunostaining of SPATA22, slides were blocked in PBS containing 5% skim milk and 5% FBS. After three washes in PBS, the sections were incubated for 1 h at room temperature with Alexa-dye-conjugated secondary antibodies (1: 1500; Invitrogen) in a blocking solution. DNA was counterstained with Vectashield mounting medium containing DAPI (Vector Laboratory).

### **Imaging**

Immunostaining images were captured with DeltaVision (GE Healthcare). The projection of the images was processed with the SoftWorx software program (GE Healthcare). All images shown were Z-stacked. Bright field images were captured with OLYMPUS BX53 fluorescence microscope and processed with CellSens standard program. For counting seminiferous tubules, immunostaining images were captured with BIOREVO BZ-X710(KEYENCE), and processed with BZ-H3A program.

### **FACS analysis**

Testes were scraped and digested with accutase (Innovative cell technologies Inc.) at room temperature in the presence of DNase II followed by filtration through a 40 µm

cell strainer (FALCON). The testicular cells were fixed in 70% ethanol for over night, washed twice with 1 % BSA in PBS and brought to a concentration of  $1 \times 10^6$  cells/ml in propidium iodide/RNase solution (50 $\mu$ g/mL). DNA content was analyzed using SP6800 spectral analyzer (Sony Biotechnology Inc., Tokyo, Japan) with 488nm laser illumination. Data were analyzed and processed using FlowJo for PC, version 10.0.7 (Becton, Dickinson & Company, Ashland, OR).

### ChIP-seq Data and Public RNA-seq data Analysis

MEIOSIN and STRA8 ChIP-seq data were described in our previous study (Ishiguro et al., 2020), and analyzed for *4930432K21Rik /Mrm* locus. MEIOSIN and STRA8 binding sites were shown along with genomic loci from Ensembl on the genome browser IGV.

Public RNA-seq data was analyzed using GEPIA2 server <http://gepia2.cancer-pku.cn/#index> (Tang et al., 2017) at the threshold of Log2FC Cutoff:1, p-value Cutoff:0.01.

### Quantification and Statistical analysis

All Statistical analysis was performed using GraphPad Prism.

**Figure 2E** Quantification of the seminiferous tubules that have H1t +/SYCP3+ cells per the seminiferous tubules that have SYCP3+ spermatocyte cells in WT (p18: n= 4, 8w: n=3) , heterozygous (p18: n= 3, 8w: n=4 ) and *Mrm* KO (p18: n= 3, 8w: n=5) testes. n: the number of animals examined for each genotype. Bar graph indicates mean with SD.

**Figure 2H** Numbers of MLH1 foci on SYCP3 axes were counted in WT and *Mrm* KO. Number of foci was indicated in the scatter plot with median. *p*-value (Mann-Whitney U-test) is shown.

**Figure 2I** Quantification of the TUNEL+ cells per total SYCP3 + spermatocytes in WT, *Mrm* +/- and *Mrm* KO mice (P18). Percentages of TUNEL+ cells per total SYCP3 + spermatocytes were calculated in 16 seminiferous tubules, that have at least one TUNEL+ cell. Averaged percentage from 3 animals (total 48 tubules) for each genotype is calculated. Bar graph indicates mean with SD.

**Figure 2J** Quantification of the seminiferous tubules that have TUNEL+ cells per total tubules in WT (8w: n= 3), *Mrm* +/- (8w: n=4) and *Mrm* KO (8w: n=5) testes. Bar graph indicates mean with SD.

**Figure 3C** Quantification of overlapped MRM and MEILB2 foci per total MRM or per total MEILB2 is shown (n= 14). Bar graph indicates mean with SD.

**Figure 3D** Quantification of overlapped MRM and MEIOB foci per total MRM or per total MEIOB is shown (n=11). Bar graph indicates mean with SD.

**Figure 3E** Quantification of overlapped MRM and RDA51 foci per total MRM or per total RDA51 is shown (n=15). Bar graph indicates mean with SD.

**Figure 3F** Quantification of overlapped MRM and DMC1 foci per total MRM or per total DMC1 is shown (n= 11). Bar graph indicates mean with SD.

**Figure 4A-F** Numbers of MEIOB, RPA2, SPATA22, MEILB2, DMC1 and RAD51 foci on SYCP3 axes were counted in WT and *Mrm* KO. Number of foci was indicated in the scatter plot with median. *p*-value (Mann-Whitney U-test) is shown.

**Figure S1B** Testis RNA was obtained from P8 WT (3 animals), P10 WT (4 animals), *Meiosin* KO (3animals) and *Stra8* KO (4animals). qPCR was performed in triplicates, and the average ddCt values were calculated for individual cDNA samples. The expression level of *Mrm* was divided by that of *GAPDH* to give a relative expression level of *Mrm* to *GAPDH*. Relative expression level of *Mrm* to *GAPDH* was normalized to 1 for a given P10 WT sample. Bar graph indicates mean with SD.

**Figure S1C** The box plot was generated using GEPIA server (Tang et al., 2017). Red box indicates tumor. Grey box indicates normal tissue. The numbers of normal (num(N)) and tumor (num(T)) samples are indicated. Statistical significance was determined by one-way ANOVA.

**Figure S3A** Quantification of the seminiferous tubules containing post-meiotic cells per total number of the seminiferous tubules in WT (n=3), *Mrm* +/- (n=4) and *Mrm* KO (n=5) mice. Bar graph indicates mean with SD.

**Figure S3B** Quantification of 1N post-meiotic cells from flow cytometry histogram were performed using Flowjo. Bar graph indicates mean with SD.

#### **DATA AND CODE AVAILABILITY**

All data supporting the conclusions are present in the paper and the supplementary materials. Sequencing data for the mouse *Mrm* gene are deposited in the National Center for Biotechnology Information-National Institutes of Health (NCBI-NIH) GenBank under accession numbers LC507101. Mouse lines generated in this study have been deposited to Center for Animal Resources and Development (CARD), *Mrm/4930432K21Rik* mutant mouse #11 (ID 2775) and *Mrm/4930432K21Rik* mutant mouse #6 (ID 2776).

#### **References**

- Baudat, F., and de Massy, B. (2007). Regulating double-stranded DNA break repair towards crossover or non-crossover during mammalian meiosis. *Chromosome Res* 15, 565-577.
- Baudat, F., Imai, Y., and de Massy, B. (2013). Meiotic recombination in mammals: localization and regulation. *Nat Rev Genet* 14, 794-806.
- Baudat, F., Manova, K., Yuen, J.P., Jasin, M., and Keeney, S. (2000). Chromosome synapsis defects and sexually dimorphic meiotic progression in mice lacking Spo11. *Mol Cell* 6, 989-998.
- Brandsma, I., Sato, K., van Rossum-Fikkert, S.E., van Vliet, N., Sleddens, E., Reuter, M., Odijk, H., van den Tempel, N., Dekkers, D.H.W., Bezstarosti, K., *et al.* (2019). HSF2BP Interacts with a Conserved Domain of BRCA2 and Is Required for Mouse Spermatogenesis. *Cell Rep* 27, 3790-3798 e3797.
- Broering, T.J., Alavattam, K.G., Sadreyev, R.I., Ichijima, Y., Kato, Y., Hasegawa, K.,



Camerini-Otero, R.D., Lee, J.T., Andreassen, P.R., and Namekawa, S.H. (2014). BRCA1 establishes DNA damage signaling and pericentric heterochromatin of the X chromosome in male meiosis. *J Cell Biol* 205, 663-675.

Cahoon, C.K., and Hawley, R.S. (2016). Regulating the construction and demolition of the synaptonemal complex. *Nat Struct Mol Biol* 23, 369-377.

Cloud, V., Chan, Y.L., Grubb, J., Budke, B., and Bishop, D.K. (2012). Rad51 is an accessory factor for Dmcl-mediated joint molecule formation during meiosis. *Science* 337, 1222-1225.

Dray, E., Siaud, N., Dubois, E., and Doutriaux, M.P. (2006). Interaction between Arabidopsis Brca2 and its partners Rad51, Dmcl, and Dss1. *Plant Physiol* 140, 1059-1069.

Enguita-Marruedo, A., Martin-Ruiz, M., Garcia, E., Gil-Fernandez, A., Parra, M.T., Viera, A., Rufas, J.S., and Page, J. (2019). Transition from a meiotic to a somatic-like DNA damage response during the pachytene stage in mouse meiosis. *PLoS Genet* 15, e1007439.

Gerton, J.L., and Hawley, R.S. (2005). Homologous chromosome interactions in meiosis: diversity amidst conservation. *Nat Rev Genet* 6, 477-487.

Handel, M.A., and Schimenti, J.C. (2010). Genetics of mammalian meiosis: regulation, dynamics and impact on fertility. *Nat Rev Genet* 11, 124-136.

Ishiguro, K., Kim, J., Fujiyama-Nakamura, S., Kato, S., and Watanabe, Y. (2011). A new meiosis-specific cohesin complex implicated in the cohesin code for homologous pairing. *EMBO Rep* 12, 267-275.

Ishiguro, K., Kim, J., Shibuya, H., Hernandez-Hernandez, A., Suzuki, A., Fukagawa, T., Shioi, G., Kiyonari, H., Li, X.C., Schimenti, J., *et al.* (2014). Meiosis-specific cohesin mediates homolog recognition in mouse spermatocytes. *Genes Dev* 28, 594-607.

Ishiguro, K.I., Matsuura, K., Tani, N., Takeda, N., Usuki, S., Yamane, M., Sugimoto, M., Fujimura, S., Hosokawa, M., Chuma, S., *et al.* (2020). MEIOSIN Directs the Switch from Mitosis to Meiosis in Mammalian Germ Cells. *Dev Cell*.

Ishishita, S., Matsuda, Y., and Kitada, K. (2014). Genetic evidence suggests that Spata22 is required for the maintenance of Rad51 foci in mammalian meiosis. *Sci Rep* 4, 6148.

Jensen, R.B., Carreira, A., and Kowalczykowski, S.C. (2010). Purified human BRCA2 stimulates RAD51-mediated recombination. *Nature* 467, 678-683.

Kojic, M., Yang, H., Kostrub, C.F., Pavletich, N.P., and Holloman, W.K. (2003). The BRCA2-interacting protein DSS1 is vital for DNA repair, recombination, and genome

stability in *Ustilago maydis*. *Mol Cell* *12*, 1043-1049.

Kurzbauer, M.T., Uanschou, C., Chen, D., and Schlogelhofer, P. (2012). The recombinases DMC1 and RAD51 are functionally and spatially separated during meiosis in *Arabidopsis*. *Plant Cell* *24*, 2058-2070.

La Salle, S., Palmer, K., O'Brien, M., Schimenti, J.C., Eppig, J., and Handel, M.A. (2012). Spata22, a novel vertebrate-specific gene, is required for meiotic progress in mouse germ cells. *Biol Reprod* *86*, 45.

Lam, I., and Keeney, S. (2015). Mechanism and regulation of meiotic recombination initiation. *Cold Spring Harb Perspect Biol* *7*, a016634.

Li, X.Z., Roy, C.K., Dong, X., Bolcun-Filas, E., Wang, J., Han, B.W., Xu, J., Moore, M.J., Schimenti, J.C., Weng, Z., *et al.* (2013). An ancient transcription factor initiates the burst of piRNA production during early meiosis in mouse testes. *Mol Cell* *50*, 67-81.

Luo, M., Yang, F., Leu, N.A., Landaiche, J., Handel, M.A., Benavente, R., La Salle, S., and Wang, P.J. (2013). MEIOB exhibits single-stranded DNA-binding and exonuclease activities and is essential for meiotic recombination. *Nat Commun* *4*, 2788.

Mahadevaiah, S.K., Turner, J.M., Baudat, F., Rogakou, E.P., de Boer, P., Blanco-Rodriguez, J., Jasin, M., Keeney, S., Bonner, W.M., and Burgoyne, P.S. (2001). Recombinational DNA double-strand breaks in mice precede synapsis. *Nat Genet* *27*, 271-276.

Marston, N.J., Richards, W.J., Hughes, D., Bertwistle, D., Marshall, C.J., and Ashworth, A. (1999). Interaction between the product of the breast cancer susceptibility gene BRCA2 and DSS1, a protein functionally conserved from yeast to mammals. *Mol Cell Biol* *19*, 4633-4642.

Neale, M.J., and Keeney, S. (2006). Clarifying the mechanics of DNA strand exchange in meiotic recombination. *Nature* *442*, 153-158.

Page, S.L., and Hawley, R.S. (2004). The genetics and molecular biology of the synaptonemal complex. *Annu Rev Cell Dev Biol* *20*, 525-558.

Peters, A.H., Plug, A.W., van Vugt, M.J., and de Boer, P. (1997). A drying-down technique for the spreading of mammalian meiocytes from the male and female germline. *Chromosome Res* *5*, 66-68.

Pispa, J., Palmen, S., Holmberg, C.I., and Jantti, J. (2008). *C. elegans* dss-1 is functionally conserved and required for oogenesis and larval growth. *BMC Dev Biol* *8*, 51.

Pittman, D.L., Cobb, J., Schimenti, K.J., Wilson, L.A., Cooper, D.M., Brignull, E.,

Handel, M.A., and Schimenti, J.C. (1998). Meiotic prophase arrest with failure of chromosome synapsis in mice deficient for Dmc1, a germline-specific RecA homolog. *Mol Cell* *1*, 697-705.

Ribeiro, J., Abby, E., Livera, G., and Martini, E. (2016). RPA homologs and ssDNA processing during meiotic recombination. *Chromosoma* *125*, 265-276.

Robert, T., Nore, A., Brun, C., Maffre, C., Crimi, B., Bourbon, H.M., and de Massy, B. (2016). The TopoVIB-Like protein family is required for meiotic DNA double-strand break formation. *Science* *351*, 943-949.

Romanienko, P.J., and Camerini-Otero, R.D. (2000). The mouse Spo11 gene is required for meiotic chromosome synapsis. *Mol Cell* *6*, 975-987.

Royo, H., Prosser, H., Ruzankina, Y., Mahadevaiah, S.K., Cloutier, J.M., Baumann, M., Fukuda, T., Hoog, C., Toth, A., de Rooij, D.G., *et al.* (2013). ATR acts stage specifically to regulate multiple aspects of mammalian meiotic silencing. *Genes Dev* *27*, 1484-1494.

Scully, R., Chen, J., Plug, A., Xiao, Y., Weaver, D., Feunteun, J., Ashley, T., and Livingston, D.M. (1997). Association of BRCA1 with Rad51 in mitotic and meiotic cells. *Cell* *88*, 265-275.

Sharan, S.K., Pyle, A., Coppola, V., Babus, J., Swaminathan, S., Benedict, J., Swing, D., Martin, B.K., Tessarollo, L., Evans, J.P., *et al.* (2004). BRCA2 deficiency in mice leads to meiotic impairment and infertility. *Development* *131*, 131-142.

Shinohara, A., and Shinohara, M. (2004). Roles of RecA homologues Rad51 and Dmc1 during meiotic recombination. *Cytogenet Genome Res* *107*, 201-207.

Siaud, N., Dray, E., Gy, I., Gerard, E., Takvorian, N., and Doutriaux, M.P. (2004). Brca2 is involved in meiosis in *Arabidopsis thaliana* as suggested by its interaction with Dmc1. *EMBO J* *23*, 1392-1401.

Souquet, B., Abby, E., Herve, R., Finsterbusch, F., Tourpin, S., Le Bouffant, R., Duquenne, C., Messiaen, S., Martini, E., Bernardino-Sgherri, J., *et al.* (2013). MEIOB targets single-strand DNA and is necessary for meiotic recombination. *PLoS Genet* *9*, e1003784.

Tang, Z., Li, C., Kang, B., Gao, G., Li, C., and Zhang, Z. (2017). GEPIA: a web server for cancer and normal gene expression profiling and interactive analyses. *Nucleic Acids Res* *45*, W98-W102.

Vrielynck, N., Chambon, A., Vezon, D., Pereira, L., Chelysheva, L., De Muylt, A., Mezard, C., Mayer, C., and Grelon, M. (2016). A DNA topoisomerase VI-like complex initiates

meiotic recombination. *Science* *351*, 939-943.

Wold, S., Boye, E., Slater, S., Kleckner, N., and Skarstad, K. (1998). Effects of purified SeqA protein on oriC-dependent DNA replication in vitro. *EMBO J* *17*, 4158-4165.

Xu, Y., Greenberg, R.A., Schonbrunn, E., and Wang, P.J. (2017). Meiosis-specific proteins MEIOB and SPATA22 cooperatively associate with the single-stranded DNA-binding replication protein A complex and DNA double-strand breaks. *Biol Reprod* *96*, 1096-1104.

Yoshida, K., Kondoh, G., Matsuda, Y., Habu, T., Nishimune, Y., and Morita, T. (1998). The mouse RecA-like gene Dmc1 is required for homologous chromosome synapsis during meiosis. *Mol Cell* *1*, 707-718.

Yoshima, T., Yura, T., and Yanagi, H. (1998). Novel testis-specific protein that interacts with heat shock factor 2. *Gene* *214*, 139-146.

Zhang, J., Fujiwara, Y., Yamamoto, S., and Shibuya, H. (2019). A meiosis-specific BRCA2 binding protein recruits recombinases to DNA double-strand breaks to ensure homologous recombination. *Nat Commun* *10*, 722.

Zhao, W., Vaithiyalingam, S., San Filippo, J., Maranon, D.G., Jimenez-Sainz, J., Fontenay, G.V., Kwon, Y., Leung, S.G., Lu, L., Jensen, R.B., *et al.* (2015). Promotion of BRCA2-Dependent Homologous Recombination by DSS1 via RPA Targeting and DNA Mimicry. *Mol Cell* *59*, 176-187.

Zickler, D., and Kleckner, N. (2015). Recombination, Pairing, and Synapsis of Homologs during Meiosis. *Cold Spring Harb Perspect Biol* *7*.



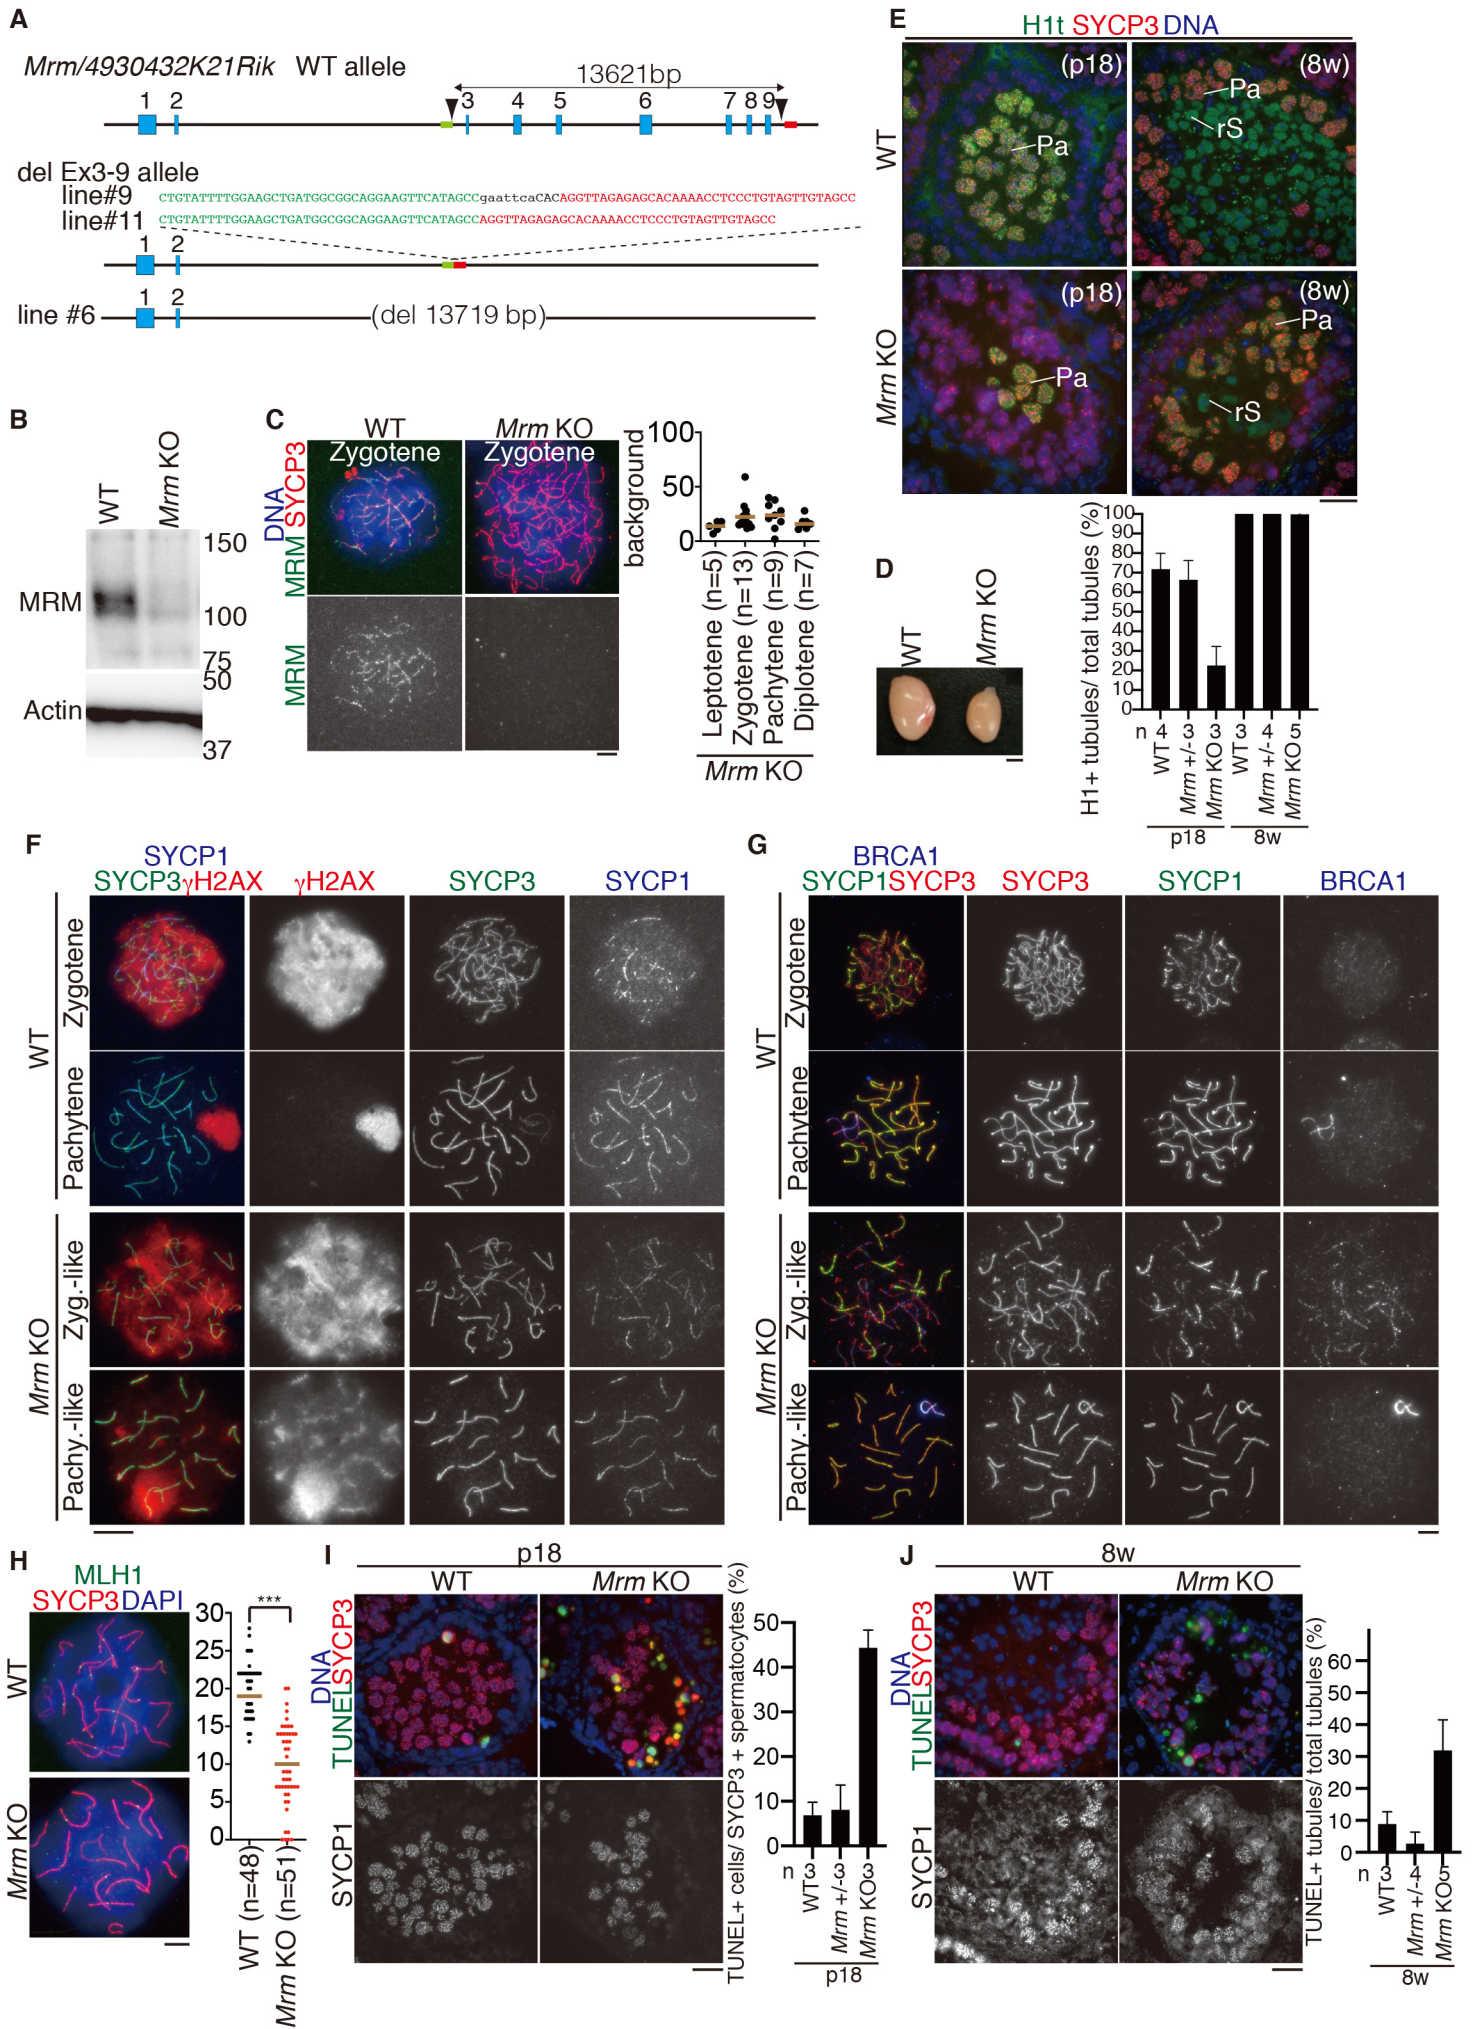

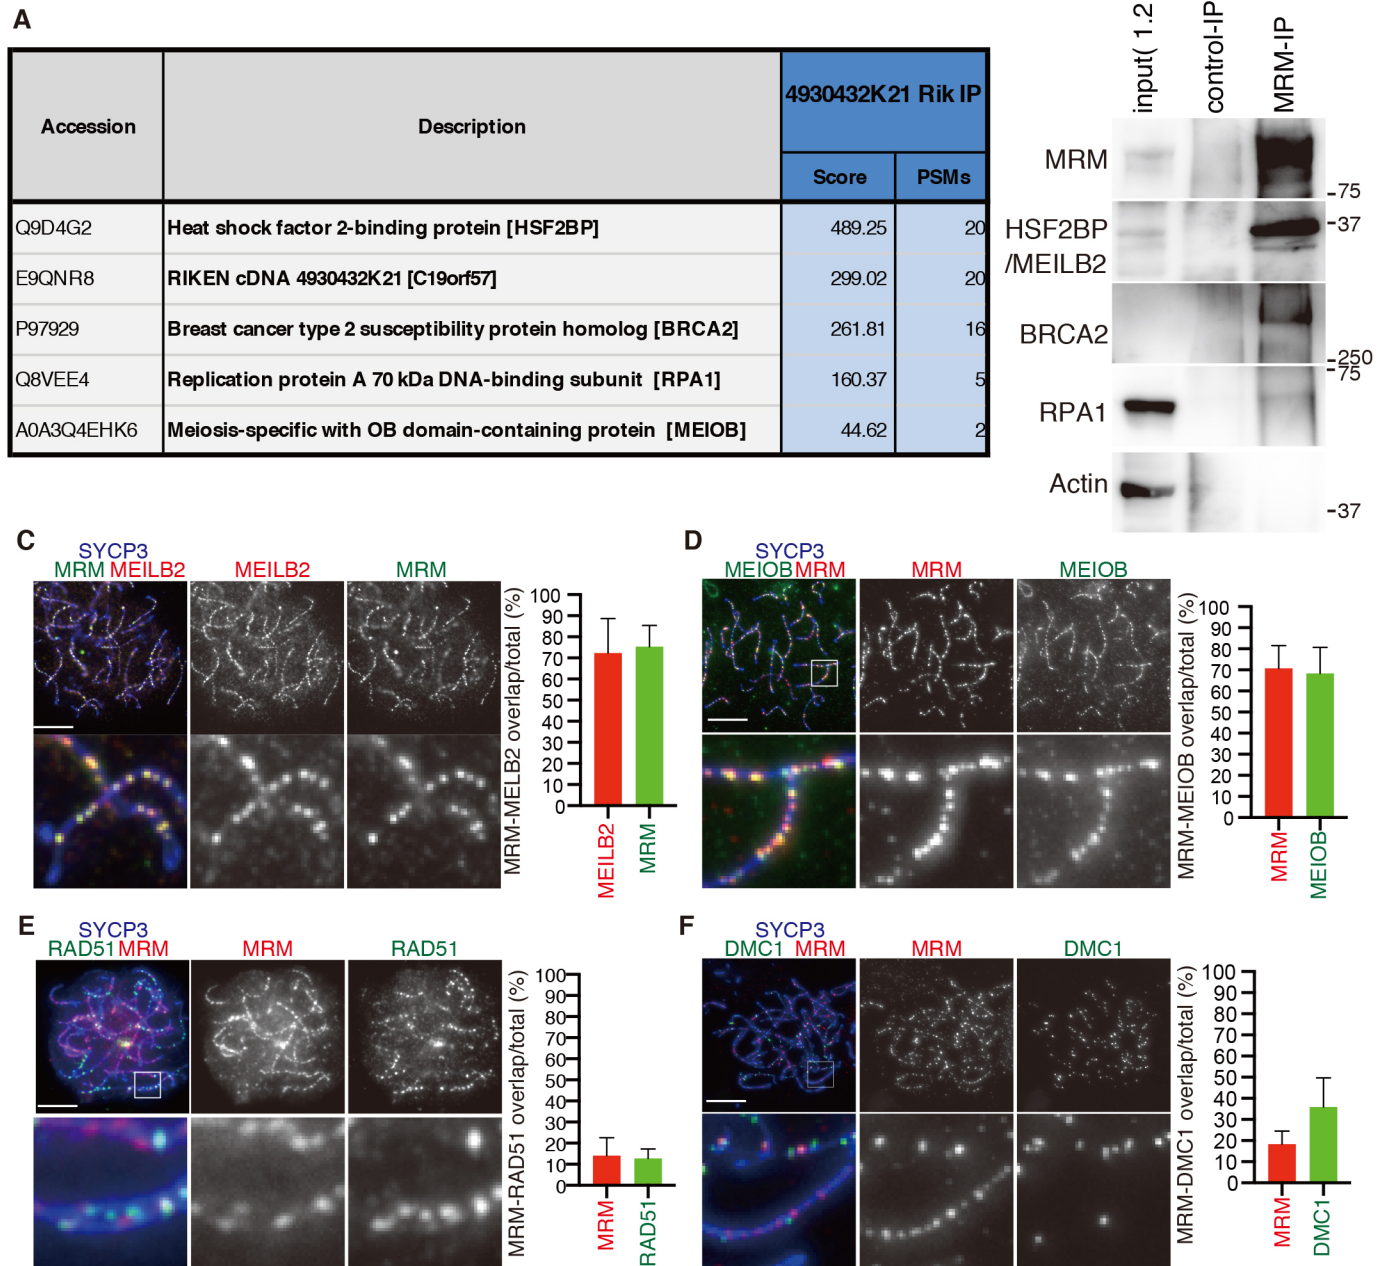

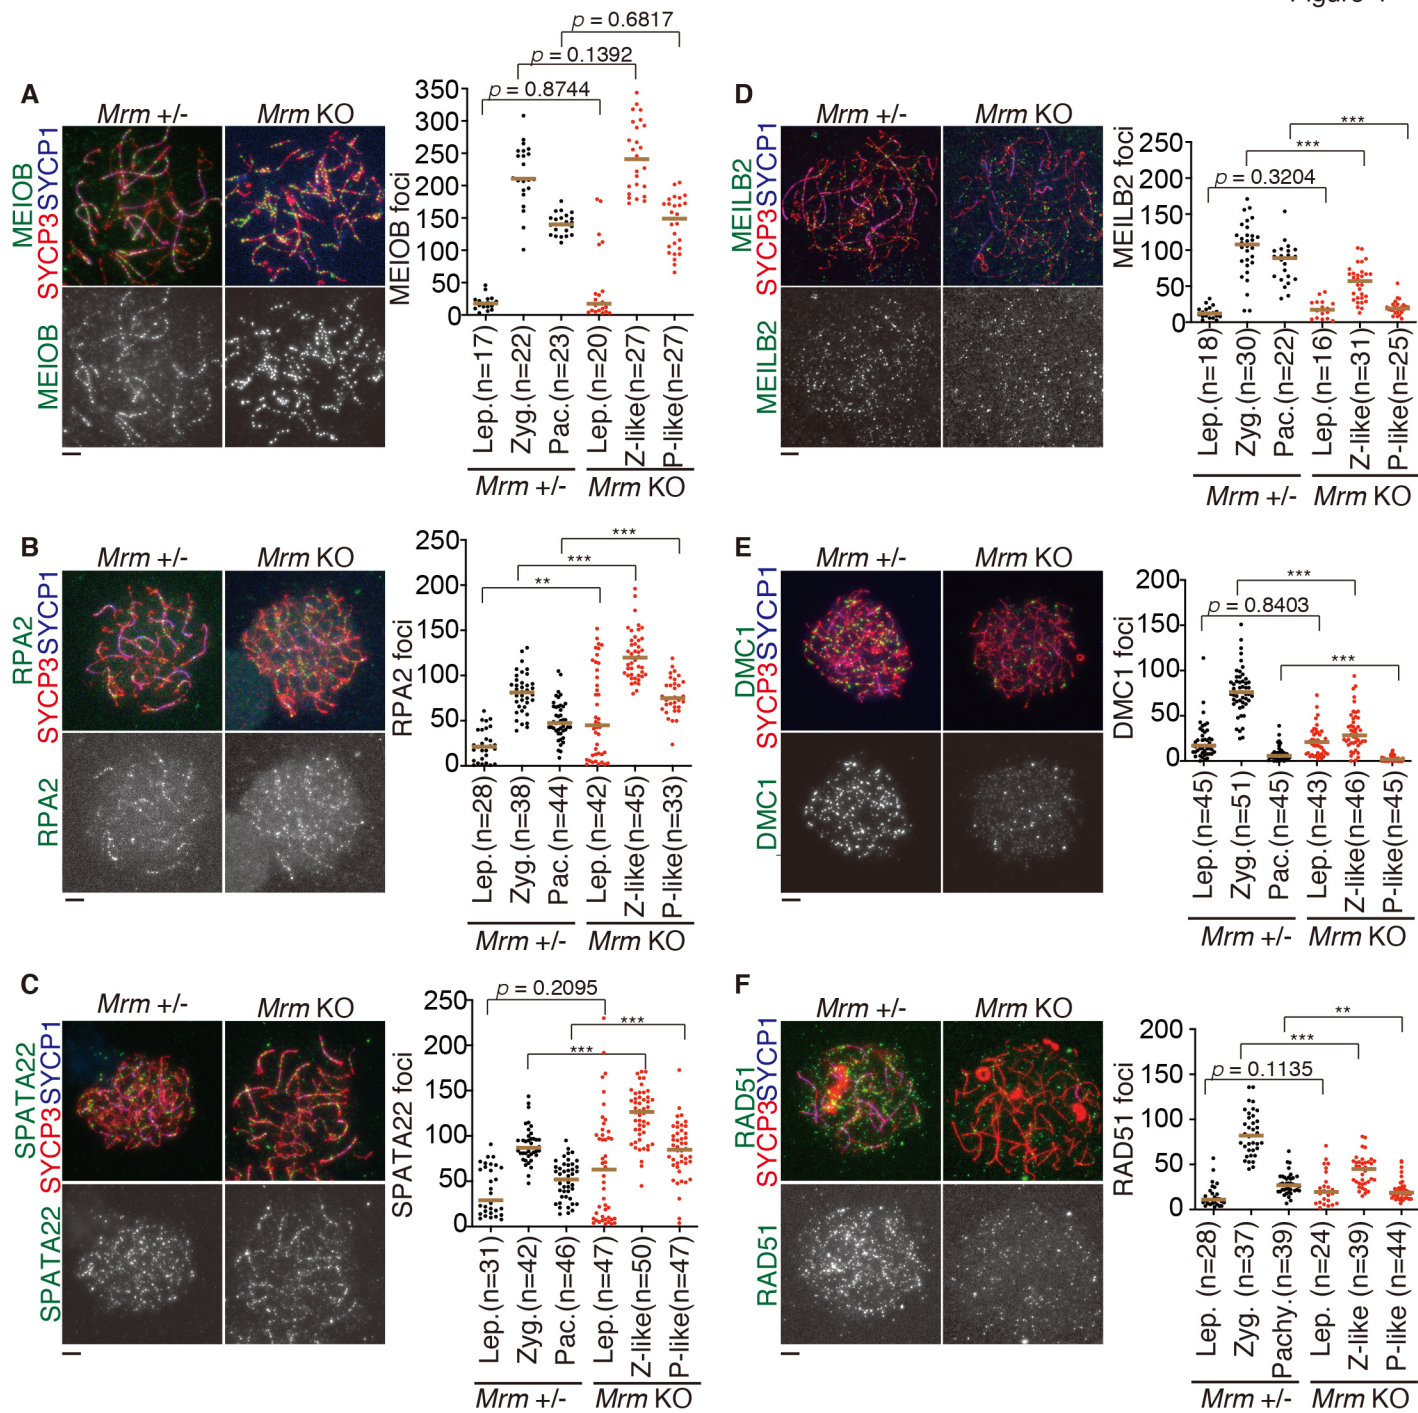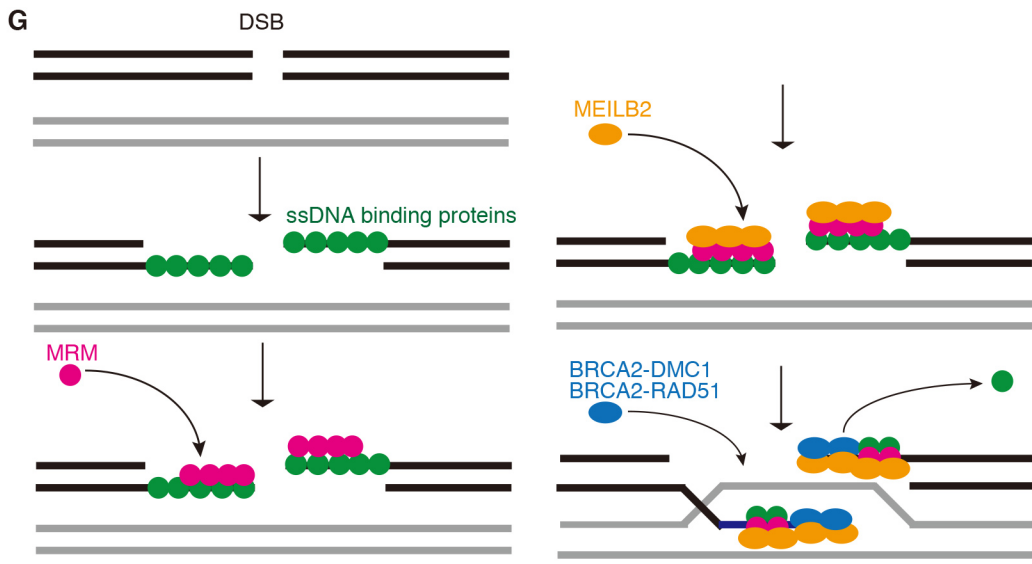



Figure S1

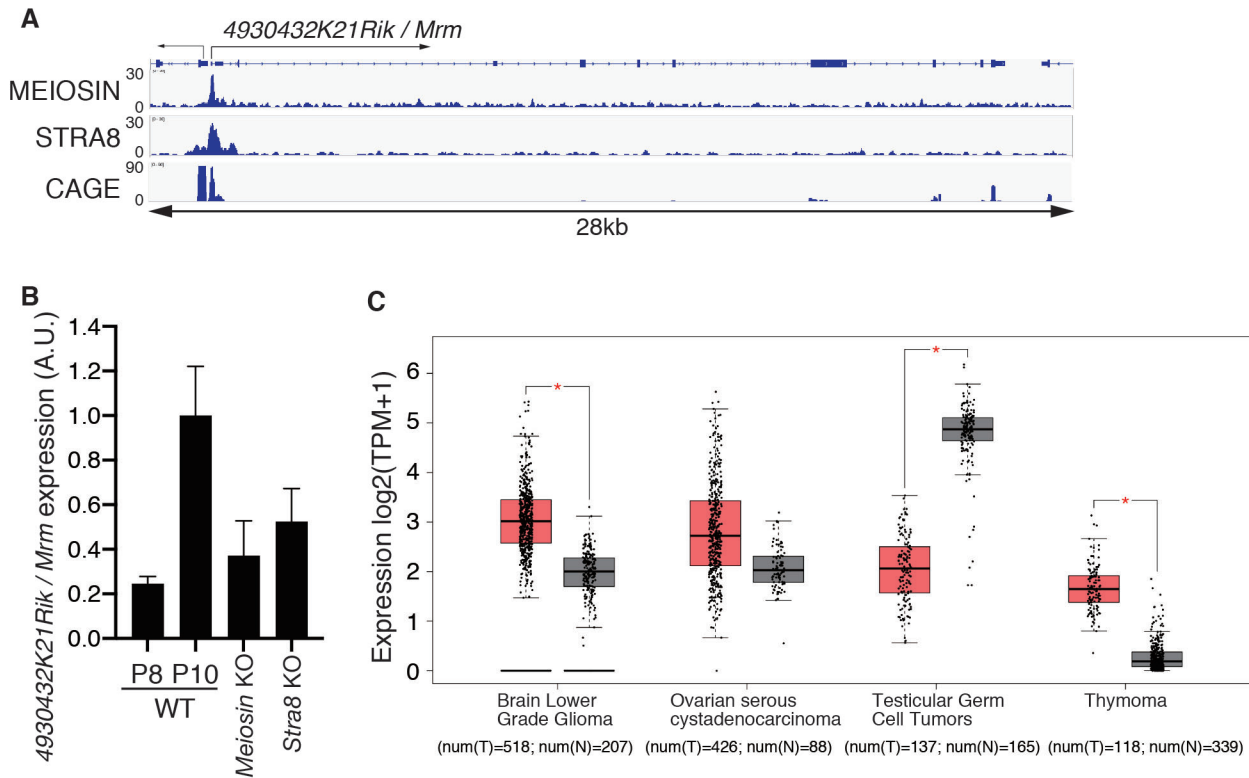

**Supplementary Figure 1. Identification of the meiosis-specific factor MRM (related to Figure 1)**

**(A)** Genomic view of MEIOSIN and STRA8 binding peaks over *4930432K21Rik/Mrm* loci. To specify testis specific TSS, RNA-seq of the 5' capped end of the mRNA (CAGE) in P10.5 testis is shown (41). Genomic coordinates were obtained from Ensembl.

**(B)** The expression of *4930432K21Rik/Mrm* in WT versus Meiosin KO was examined using RT-PCR. Testis RNA was obtained from WT (P8 and P10), *Meiosin* KO and *Stra8* KO.

**(C)** Expression of *MRM/C19orf57* in human tumors and normal tissues of different origin. The plot was generated from public RNA-seq data using GEPIA2 server (Tang et al., 2017). Red box indicates tumor. Grey box indicates normal tissue. Number of normal (num(N)) and tumor (num(T)) samples is indicated; Tpm – transcripts per kilobase million. Statistical significance was determined by one-way ANOVA.

```

Gallus 1 MGRK-----RK-----
Homo 1 MRGAGPRGARERGRARAGVRRGGDICGVQSVQCSPTGSGFTWALGLWSPHFSVVGVVSVWGLSPGAG-----STAPTLRPFHLSPPDSR
Macaca 1 MTRK-----
Mus 1 MNK-----KK-----
Pogona 1 MSK-----KR-----
Rattus 1 MRK-----WA-----LHL-----E-----WGLSPSSHGKHQNWSPCPHHRPHTLVQL-----

Gallus 6 -----SSQAAGGA---DGDGCAAKTRFG---I-
Homo 84 PPAFCEGQFGHLFFPKRVTRIIQATYSQLIQAELVSDKDRGSSTTSVAQISQGEDKMTKRKLLRTSGEG---LCPKPKLK-NPR---LG
Macaca 4 -----RKKLRTSGDG---LCPKPKLK-TPR---LDG
Mus 6 -----QRNSGVG---LHPSKPSK-NPR---LR
Pogona 6 -----KANISEENRELSISKAKK-ISKRTQLT
Rattus 39 -----WCSAMLTAMLSLLES-----LPLTSLSKPGGS---LHPSKPSK-NPR---LR

Gallus 27 -----QGDG---GTTADRGTTCGVTGGG---TNGDTRNGDRNGESTAGRDTRNGGD
Homo 166 DFPYCDPOSSMLGCLHHPHPEPEEGKLGFPVP-STQOHG-EEPGKAVSS---SPDEETGSPCRILLROPEKE---PAPLPPSONSFGRFVPOF
Macaca 27 DSDGDPQSEPMGLGCLHHPHPEPEESKLGFPVP-STQOHG-EEPGKAVCS---SPDEETGAPCWLLROPEKE---PAPLPPSONSVGRFVPOF
Mus 26 D---SQSSMMVHSHYSRESEDSSEFAP-SVELGC-EEPLHEAFS---CPVEDTGAASDLAGSP-KE---LVPLPPSONSVGKRFVPOF
Pogona 34 EK---SDLKMSAQTVHTNKCLSKVTAAGINQBYKCMTEREHLALNLDTSLED-CT--KASFOK-KD---TVFLPPSQGE---KLVPVF
Rattus 80 DPRGSPORSMTVSHHSRESEDSSEFAP-SVEPAC-EEPPQPASS---CPVEDTGAASDLPGSP-KE---LVPLPPSQSVGRFVPOF

Gallus 72 TNGESTAGRDTRN-----GGDRNGE-ST-----A-----GRDTRNGDTRNGDTRAGEDATGRDPIGGDM
Homo 246 AKSRKTVTRKKE-----MKDEIRG-SGAFSL---ETIAPSSA-QSPGCOLLVETLGVFLQEALELGDPTOADSARPEOSSQSPVQAVP
Macaca 107 AKSRKTVTRKKE-----TKDENLR-SGAFSL---ETIAPSSA-QSPGCOLLVETLGLFQEALELGDPTOADSARPEOSSQSPVQAVP
Mus 101 AKPRKTVTRKAK-----AWEDLE-GCTTSQ---ETRPELGA-LKAASQPORESLRFPPHDP-RPEVOTQPDGTLSKERTI
Pogona 110 KKPTKPLSERCDRTFGKTTTWTTEQHVDNRNVDMTEGAVQRTGASEGHPPTPLETKV---EDPKDKAVPECEKPSERLNVOTQDQIGKR
Rattus 159 AKPRKTVTRKTK-----AWEDPE-SCTTSQ---ETTPPELGA-LEAASQPORESLRFPLHDARRPEDQTPDPTGTLSKERTS-----

Gallus 123 TCGDVTGGDTAGDTRGDMTGCHTNGCVTAGE-----NTSGGDR-----GDTNGGDTA---GGDVTGG-----
Homo 324 GSGDSQDPPDRGT-----GLSASQRASQDHLSEQGAEDSK---PETDRVPGD---GGQKEHL-----
Macaca 185 SSGDSQDPPDRGT-----GLSSQSRASQDHLSEQGAEDSR---PETDGVPGD---GGQKEHL-----
Mus 171 -----SLDNRSGLNGG---FEMATVODS---SS---PL
Pogona 197 LNNDVLETGLLSSQ-----GLE---RESNLQTNISEKKTPEKPNMFFMCTPDNESVNNLEKROLSLKSFICFPVDQRNFIL
Rattus 230 -----SLDTGSLNNG---FEMATVODS---SSQGRTL-----

Gallus 179 -----D---TRGDTAGDTRGDTSGCNTAGRDTR-AGRDVTGGDT-----MSGG-----
Homo 377 -----PSIDSEGEKPDRCAPQEGGA---ORT-ACAGLPGGPO-----EGDGVPCPTPASAPTSGPAPGLGPASWCLEPQSV
Macaca 238 -----PSSIDSEGEKPDRCALKEGGA---ORT-ACAGLPGGPO-----EGDSTPCPTPASAPTLGPALGLGPASWCLEPQSV
Mus 195 -----SDAAAEGRADSRDPOERDA---OGGEAQAQHSCEPQ-----EGEDILYTSALAPASEPT-----WSV
Pogona 271 AQERIIDSKNIQNEEHPSPRV--DMCTE--OKV-IQAILEADGIKEANCLONGSRITVGSVEGM-----AIGSQKQSNFLCTSSV
Rattus 257 -----SAAAAGERADSSPQEGGT---OGGEAQAQHSCEPQ-----EGEDILYTSALVPSADPT-----IPCLETWSV

Gallus 219 -----DITNGVTTG---RDTIRGDTAGRDVTGCDTIT-----GGDVTGGD
Homo 444 A-OGSPDPQOTPSRMGREGGT-----HSSLGCSLLGMVVIADLSTDPTELEERALEVAGPDQASAI SPASER---RKA
Macaca 305 A-OGSPDPQOTPSRMGREGGT-----HSSLGCSLLGMVVIADLSTDPTELEERALEVAGPDQASAMSPASEK---RKA
Mus 250 A-QDLSVPTTLLSTA--AAPS---STSPADASLMDTVITEVSLDPSVLOQSAPOVAKLLGS---LD---EQI
Pogona 347 AREGNFNSRETNQFLPYKSEKPEEKNIYKSTEIFEPRNRKHTSMAGETVI---DQHKVOTDSKP-----VV
Rattus 318 A-QDLSVPTTHILHSTA--AAPS---FGSPAGASLMDSVITEVSLDLSVLQHSALVVGSLLSG---PD---GQI

Gallus 256 TNGCNTAA--GVFSGGVTFGGDTIRGDTAGCD-----TTTGGDVTGCDTAGSDAMAD
Homo 515 ADGGHRRRALPGCTS---LTGETTCEGSEAGQD-----GKPPGDVLVGPATA-SLALAP
Macaca 376 ADGGYRRRALPGCTP---LTGETTCEMGEAGQD-----DKPPGDVLPVGPATA-SLALAP
Mus 311 PDGGCIGTLLSSTP---LAETTAGREEARWE-----ERCHGDTL-ASFT-ET---EP
Pogona 410 QSGGDRTEGSSSC---GRETFVQKHHVQDISKDLPLNQSVQVXLEKEDI LYEQNCKQIIATSNQFFPEPAGDIQSESRK-KPMKGV
Rattus 379 PDGGCSGT---LAETTPAGSKETRWK-----EKSPGDETLANIT-ETA-VF

Gallus 306 GRGMDTAHGATES-----
Homo 563 GSGESMMGAGDSGHASP---DTGFCVNOKQEPG-----PAQ---EAEIT-----
Macaca 424 GSGESMMGAGDVSNAHAAT---DTGFCVDQKQEPG-----BTP---EAAES-----
Mus 356 EKQEPVTEAGDSGHIAQ---EMDPVVKTKD-SGSDEQSPGDI GMLPLPAQSMNQMLVET-----
Pogona 496 SCAEKRWTKETEMRTTLGKNITATLDPNIPIL---BTO---QHKENGENLLCSIKQLEFNICDLRPGLEAMSEKKMI
Rattus 420 VKQEPVTEAGDSSGHIAQ---EMGPAVVKTKD-PGSDGQLPGDIGMLPLPAQPMDEKVVET-----

Gallus 320 -----RSEDEGSAAPPQHRVV-----EEF-----S-NGDL-----AFPS--HILRGVAVQREDAST
Homo 601 -----GCONLERDLEGRVSPQASVVLREHREIADDPLOEPGA-QQGI-DTTSLAGQDHLPHSADQ
Macaca 462 -----GQDLEODLEGRVSPQASVVLPEHREAADSPLQEPGA-QQGI-DTTSLAGQDHLPHSADQ
Mus 411 -----RCLTCDODLECLS-TPHTSQLEHTCAASDPPOSTKD-CHSSFCIPVHLA---APCPRDQ
Pogona 568 KQTLANILMTETKTI RSVSFFTNDSSFKDSVTCEENKNKLSLSSDILPLVLRVSDTTEESKTDSEAGSTLLSFKADSNLSAPSVLDT
Rattus 475 -----SCLTYDQDLEGLSLYPHTPSQLEHTCLASDPPQSSKA-CHSSFDIPVHPAGKQPPAPSLRDQ

Gallus 346 -----AQPTSSQPEVLPCEPED-----S-NGDL-----AFPS--HILRGVAVQREDAST
Homo 662 -----GTWADSLAVELDFLDSQIQDALDASDFEAPPEOLFPSGNKPGPCWPCPSSHA-NGDPVAVAKAQPRTFVGIQASASRMEDATN
Macaca 522 -----AAWADSSAVELDFLDSQIQDALDASDFEAPPEOLFPSGNKPGPCWPGSPRA-NGDPVAVAKAQPRTFVGIQASASRMEDATN
Mus 466 -----AAWQESSAMELDFLPDSQIQDALDANME---OGFPGSGMPLDGLWFPVSSQISGGSRAVATKPSRSHVETWAOETVRMOPDAD
Pogona 658 VAQISTSYTDTLALDLFLPDSQIQDALDANME---OGFPGSGMPLDGLWFPVSSQISGGSRAVATKPSRSHVETWAOETVRMOPDAD
Rattus 536 -----AAWQESSAMELDFLPDSQIQDALDANME---OGFPGSGMPLDGLWFPVSSQISGGSRAVAKPOPRPHVGTWAOETVRMOPDAD

Gallus 387 VLCCLILELSNLRRLMGAHRAVEALRRLRRLRRRSWGAARR-----RTEGEAGMKQRRRL
Homo 746 VVRGLIVELSNLRRLIMGTHRDLEAFKRLNRYRKTLPKGGKAPLPYPSKPGPNVPRGDPVWREL
Macaca 606 TVHGLIVELSNLRRLIMGTHRDLEAFKRLNRYRKTLPKGGKAPLPYPSKPGPNVPRGDPVWREL
Mus 547 TVRGLVVELSGLNRLIMSTHRDLEAFKRRKT--K---SLPYLTKGLGSLARGDQWRDL
Pogona 742 VVCGLIKELSNLRRLIMVHRDLSFKRLKLRNRNQPCK-LLSHNVNNTTNRCTGGKRRDL
Rattus 617 TVRGLVVELSGLNRLIMSTHRDLEAFKRRKT--K---SLPYLTKGLGSLARGDQWRDL

```

**Supplementary Figure 2. Sequence alignment of MRM/C19orf57 homologs in vertebrates (related to Figure 1)** MRM/C19orf57 protein is conserved among vertebrates. The amino acid sequence of *M. musculus* MRM (mouse, LC507101) derived from this study. C19orf57 homologs of *R. norvegicus* (rat, XP\_008770650.1), *H. sapiens* (human, NP\_001332772.1), *Macaca mulatta* (monkey, XP\_001111192.4), *Pogona vitticeps* (reptile, XP\_020654389.1) and *Gallus gallus* (chick, XP\_025001159.1) were obtained from the National Center for Biotechnology Information-National Institutes of Health (NCBI-NIH) protein database.

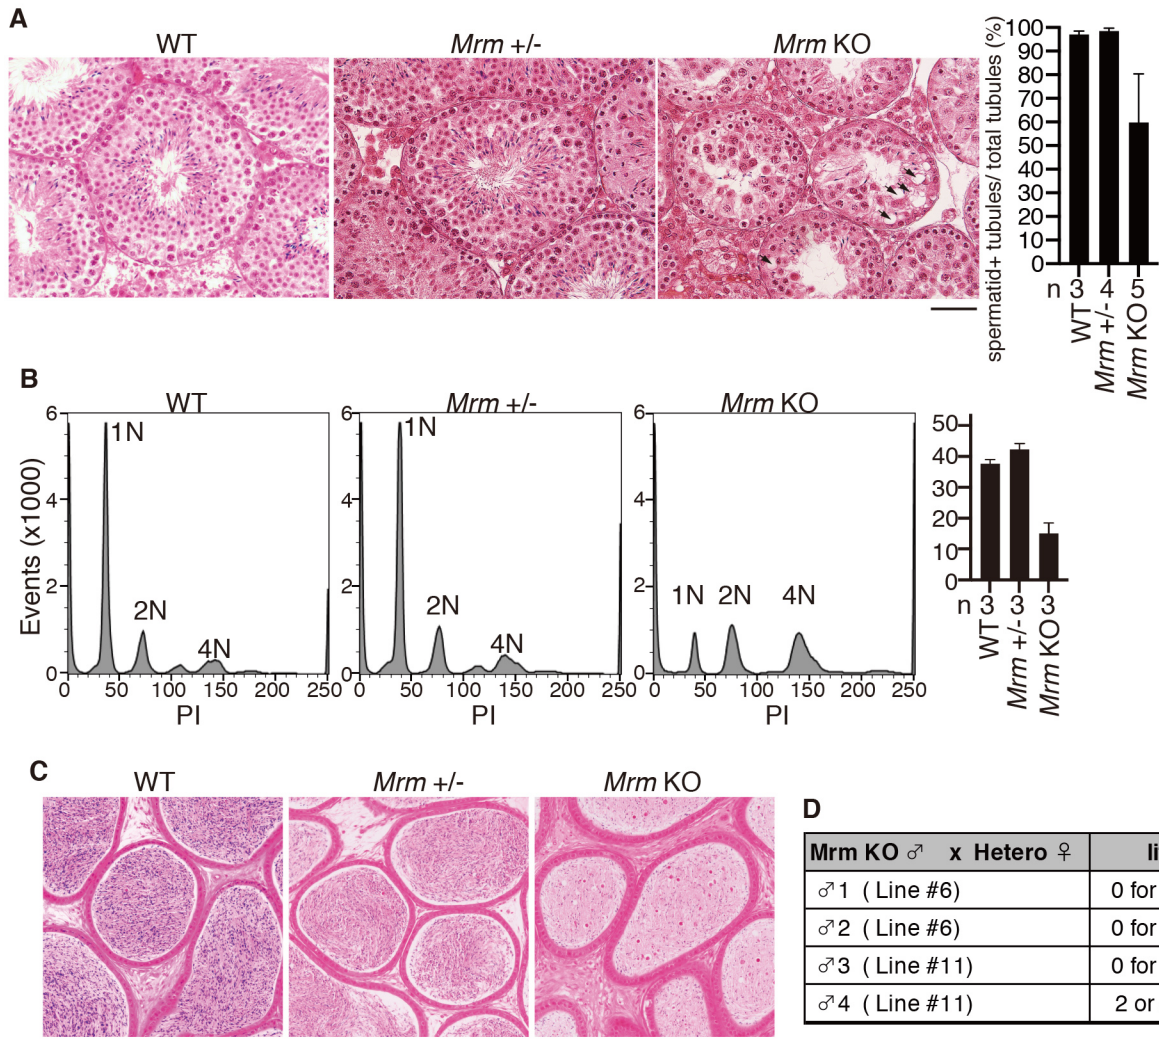

**Supplementary Figure 3. Spermatogenesis was impaired in *Mrm* KO testis (related to Figure 2)**

**(A)** Hematoxylin and eosin staining of the sections from WT, *Mrm* +/- and *Mrm* KO testes (eight-week-old). Arrow indicates a vacuole. Scale bar: 50  $\mu$ m. Quantification of the seminiferous tubules containing post-meiotic cells per total number of the seminiferous tubules in WT testes (bar graph with SD). n : the number of the animals examined for each genotype. **(B)** Flow cytometry histogram of propidium-iodide (PI)-stained testicular cells isolated from 8-week old *Mrm* +/- (WT), *Mrm* +/- and *Mrm* KO mice. N indicates DNA content in the cell population. Quantification of 1N post-meiotic cells is shown (bar graph with SD, n=3 for each genotype). **(C)** Hematoxylin and eosin staining of the sections from *Mrm* +/- (WT), *Mrm* +/- and *Mrm* KO epididymis (eight-week-old). Scale bar: 50  $\mu$ m. **(D)** Fertility of *Mrm* KO male was examined by mating with *Mrm* +/- females for the indicated period. Note that apparent differences were not observed between *Mrm* +/- (WT) and *Mrm* +/- testes.

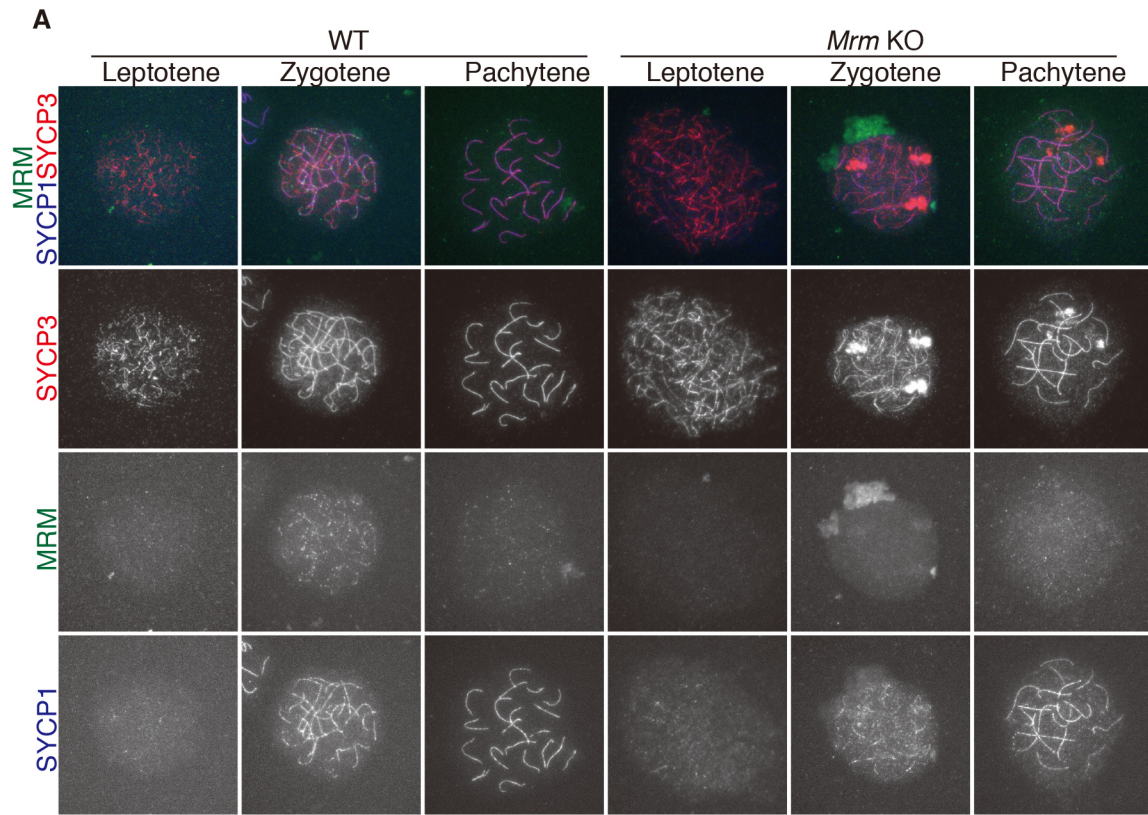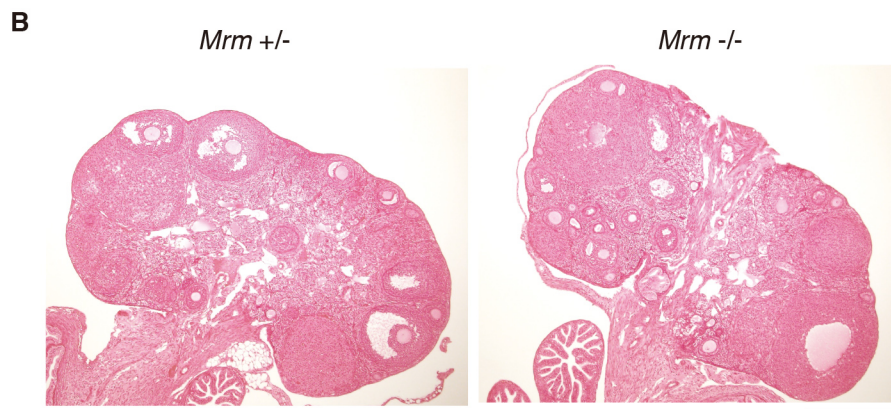

**Supplementary Figure 4. Phenotypic analyses of *Mrm* KO ovaries (related to Figure 2)**

**(A)** Chromosome spreads of oocytes in WT and *Mrm* KO (KO allele #6) were stained for MRM, SYCP3, and SYCP1. Scale bars : 5  $\mu$ m. **(B)** Hematoxylin and eosin staining of the sections from *Mrm*+/- and *Mrm* KO (KO allele #6) ovaries (eight-week-old). Scale bar: 500  $\mu$ m.
